# Supplementary material for: Energetics and J-coupling constants for Ala, Gly, and Val peptides demonstrated using ABEEM polarizable force field in vacuo and an aqueous solution
Source: Royal Society of Chemistry journal article supplement (doi:10.1039/d1cp05676j), 2022-01-01
Supplement: d1cp05676j1.pdf [file d1cp05676j1.pdf]

Supporting Information of: Energetics and  $J$ -coupling constants for Ala,  
Gly, and Val peptides demonstrated using ABEEM polarizable force field  
in vacuo and an aqueous solution

Chao Zhang<sup>a</sup>, Dong-Xia Zhao<sup>\*a</sup>, Yue Feng<sup>a</sup>, Jie Wang<sup>a</sup> and Zhong-Zhi Yang<sup>\*a</sup>

<sup>a</sup> School of Chemistry and Chemical Engineering, Liaoning Normal University, Dalian, 116029,  
Liaoning, P. R. China.

\* Corresponding authors: Tel: (86) 411-82158977; Fax: (86) 411-82158977

E-mail address: [zhaodxchem@lnnu.edu.cn](mailto:zhaodxchem@lnnu.edu.cn) and [yangzz@lnnu.edu.cn](mailto:yangzz@lnnu.edu.cn).

Table S1 The number of each amino acid and the distribution percentage in 16 regions of PES from coil library

Equation S1 Hydrogen bonding fitting function

Table S2 Parameters in the function  $k_{\text{HB}}(R_{\text{H},lp})$  for different H,  $lp$  pairs

Table S3  $J$ -coupling constants and their Karplus parametrizations used in this study

Table S4 The details of transfer by crossing  $\varphi=0^\circ$  obtained by different methods

Table S5 The backbone torsions ( $^\circ$ ) of all Gly- and Val-dipeptides conformations obtained by B3LYP/6-311++G(d,p), ABEEM, OPLS/AA, AMBER99sb, CHARMM27, and AMOEBA and MAD values ( $^\circ$ ) obtained by each FF compared with those of B3LYP/6-311++G(d,p)

Table S6 The number of conformation and mean absolute deviation (MAD/ $^\circ$ ) of dihedral angles at the backbones of Gly and Val dipeptides and tripeptides obtained by the OPLS/AA, AMBER99sb, CHARMM27, AMOEBA, and ABEEM methods compared with B3LYP/6-311++G(d,p)

Table S7 The backbone torsions ( $^\circ$ ) of Ala stable conformations obtained by B3LYP/6-311++G(d,p), ABEEM, OPLS/AA, AMBER99sb, CHARMM27, and AMOEBA, the number of conformations that located by each force field and the MAD with B3LYP/6-311++G(d,p)

Table S8 The number, value ( $^\circ$ ) and mean absolute deviation (MAD/ $^\circ$ ) of dihedral angles at backbone of the Ala-tripeptide's stable conformations by B3LYP/6-311++G(d,p), OPLS/AA, AMBER99sb, CHARMM27, AMOEBA, and ABEEM methods

Table S9 The number, value ( $^\circ$ ) and mean absolute deviation (MAD/ $^\circ$ ) of dihedral angles at backbone of the Gly-tripeptide's stable conformations by B3LYP/6-311++G(d,p), OPLS/AA, AMBER99sb, CHARMM27, AMOEBA, and ABEEM methods

Table S10 The number, value ( $^\circ$ ) and mean absolute deviation (MAD/ $^\circ$ ) of dihedral angles at backbone of the Val-tripeptide's stable conformations by B3LYP/6-311++G(d,p), OPLS/AA, AMBER99sb, CHARMM27, AMOEBA, and ABEEM methods

Table S11 The MAD ( $^{\circ}$ ) of  $\chi_1$  at side chain of all Val conformations by force fields

Table S12 The energy  $\Delta E$  values (kcal/mol) of all Ala conformations obtained by MP2/6-311++G(d,p), ABEEM, OPLS/AA, AMBER99sb, CHARMM27, and AMOEBA and RMSD values (kcal/mol) by each FF compared with those of MP2/6-311++G(d,p)

Table S13 The energy  $\Delta E$  (kcal/mol) of Ala stable conformations obtained by MP2/6-311++G(d,p), ABEEM, OPLS/AA, AMBER99sb, CHARMM27, and AMOEBA

Table S14 The backbone distribution of Gly-dipeptide and tripeptide in Ramachandran map from B3LYP/6-311++G(d,p) and each force field after and before classified (after classified / before classified)

Table S15 The backbone distribution of Val-dipeptide and tripeptide in Ramachandran map from B3LYP/6-311++G(d,p) and each force field after and before classified (after classified / before classified)

Table S16 The  $^3J(H_N, H_{\alpha})$  (Hz) of the central residue of Ala tetrapeptide under different temperature (K)

Table S17 The  $J$ -coupling constants (Hz) of residues in (Ala)<sub>4</sub> obtained by dynamic and NMR

Table S18 The  $J$ -coupling constants (Hz) of residues in (Ala)<sub>6</sub> obtained by dynamic and NMR

Table S19 The  $J$ -coupling constants (Hz) of residues in (Ala)<sub>7</sub> obtained by dynamic and NMR

Fig. S1 A comparison of charge distributions obtained from the ABEEM method and the *ab initio* HF/STO-3G method. (a) Ala-dipeptides; (b) Ala-tripeptides; (c) Gly-dipeptides; (d) Gly-tripeptides; (e) Val-dipeptides; (f) Val-tripeptides

Fig. S2 Lower energy areas and stable conformations by B3LYP/6-311++G(d,p) and ABEEM polarizable force field

Fig. S3 RMSD of backbone atoms from dynamic simulations of (Ala)<sub>3</sub>, (Gly)<sub>3</sub>, (Val)<sub>3</sub>, and (Ala)<sub>5</sub>

Fig. S4 Karplus curve (black line) of the measured  $J$ -coupling constant  $^3J(H_N, H_{\alpha})$  for center residue of (Ala)<sub>3</sub> (red line) and (Val)<sub>3</sub> (blue line) from conformations derived

from MD simulation by ABEEM polarizable force field

Table S1 The number of each amino acid and the distribution percentage in 16 regions of PES from coil library

| Residue | Number  | $\beta_{L-1}$ | $\beta_{L-2}$ | $\beta_{L-3}$ | $\beta_{L-4}$ | $\epsilon_{L-1}$ | $\epsilon_{L-2}$ | $\epsilon_{D-1}$ | $\epsilon_{D-2}$ | $\delta_{L-1}$ | $\delta_{L-2}$ | $\delta_{D-1}$ | $\delta_{D-2}$ | $\gamma_L$ | $\alpha_D$ | $\alpha_L$ | $\gamma_D$ |
|---------|---------|---------------|---------------|---------------|---------------|------------------|------------------|------------------|------------------|----------------|----------------|----------------|----------------|------------|------------|------------|------------|
| Ala     | 280950  | 0.17          | 0.00          | 0.00          | 0.00          | 0.23             | 0.00             | 0.00             | 0.00             | 0.03           | 0.00           | 0.00           | 0.00           | 0.08       | 0.02       | 0.45       | 0.00       |
| Cys     | 45944   | 0.22          | 0.00          | 0.01          | 0.00          | 0.32             | 0.01             | 0.00             | 0.00             | 0.07           | 0.00           | 0.01           | 0.00           | 0.14       | 0.04       | 0.17       | 0.00       |
| Asp     | 229731  | 0.08          | 0.00          | 0.01          | 0.00          | 0.18             | 0.02             | 0.00             | 0.01             | 0.06           | 0.00           | 0.01           | 0.00           | 0.18       | 0.09       | 0.36       | 0.01       |
| Glu     | 278149  | 0.12          | 0.00          | 0.00          | 0.00          | 0.20             | 0.00             | 0.00             | 0.00             | 0.03           | 0.00           | 0.01           | 0.00           | 0.09       | 0.03       | 0.50       | 0.00       |
| Phe     | 142724  | 0.26          | 0.00          | 0.00          | 0.00          | 0.30             | 0.00             | 0.00             | 0.00             | 0.05           | 0.00           | 0.01           | 0.00           | 0.13       | 0.01       | 0.23       | 0.00       |
| Gly     | 340778  | 0.06          | 0.02          | 0.02          | 0.05          | 0.09             | 0.03             | 0.04             | 0.09             | 0.01           | 0.00           | 0.00           | 0.01           | 0.03       | 0.29       | 0.12       | 0.13       |
| His     | 90335   | 0.20          | 0.00          | 0.01          | 0.00          | 0.22             | 0.00             | 0.00             | 0.00             | 0.06           | 0.00           | 0.02           | 0.00           | 0.16       | 0.05       | 0.27       | 0.01       |
| Ile     | 207926  | 0.21          | 0.00          | 0.00          | 0.00          | 0.31             | 0.00             | 0.00             | 0.00             | 0.07           | 0.00           | 0.01           | 0.00           | 0.16       | 0.00       | 0.23       | 0.00       |
| Lys     | 252806  | 0.13          | 0.00          | 0.00          | 0.00          | 0.25             | 0.00             | 0.00             | 0.00             | 0.03           | 0.00           | 0.01           | 0.00           | 0.11       | 0.04       | 0.41       | 0.01       |
| Leu     | 300972  | 0.12          | 0.00          | 0.00          | 0.00          | 0.33             | 0.00             | 0.00             | 0.00             | 0.04           | 0.00           | 0.01           | 0.00           | 0.15       | 0.01       | 0.35       | 0.00       |
| Met     | 65713   | 0.19          | 0.00          | 0.00          | 0.00          | 0.27             | 0.00             | 0.00             | 0.01             | 0.05           | 0.00           | 0.01           | 0.00           | 0.12       | 0.01       | 0.34       | 0.00       |
| Asn     | 172723  | 0.09          | 0.00          | 0.01          | 0.00          | 0.16             | 0.01             | 0.00             | 0.00             | 0.06           | 0.00           | 0.01           | 0.00           | 0.21       | 0.18       | 0.26       | 0.01       |
| Pro     | 153828  | 0.00          | 0.00          | 0.00          | 0.00          | 0.50             | 0.01             | 0.00             | 0.00             | 0.00           | 0.00           | 0.00           | 0.00           | 0.06       | 0.00       | 0.42       | 0.00       |
| Gln     | 148167  | 0.15          | 0.00          | 0.00          | 0.00          | 0.23             | 0.00             | 0.00             | 0.00             | 0.04           | 0.00           | 0.01           | 0.00           | 0.11       | 0.04       | 0.42       | 0.00       |
| Arg     | 200214  | 0.17          | 0.00          | 0.00          | 0.00          | 0.24             | 0.00             | 0.00             | 0.00             | 0.04           | 0.00           | 0.01           | 0.00           | 0.11       | 0.04       | 0.38       | 0.00       |
| Ser     | 244401  | 0.24          | 0.00          | 0.01          | 0.00          | 0.25             | 0.01             | 0.00             | 0.00             | 0.04           | 0.00           | 0.01           | 0.00           | 0.08       | 0.03       | 0.32       | 0.00       |
| Thr     | 230955  | 0.25          | 0.00          | 0.01          | 0.00          | 0.31             | 0.01             | 0.00             | 0.00             | 0.04           | 0.00           | 0.02           | 0.00           | 0.10       | 0.00       | 0.26       | 0.00       |
| Val     | 272223  | 0.27          | 0.00          | 0.00          | 0.00          | 0.31             | 0.00             | 0.00             | 0.00             | 0.07           | 0.00           | 0.01           | 0.00           | 0.13       | 0.00       | 0.20       | 0.00       |
| Trp     | 46042   | 0.22          | 0.00          | 0.01          | 0.00          | 0.31             | 0.00             | 0.00             | 0.00             | 0.04           | 0.00           | 0.01           | 0.00           | 0.11       | 0.01       | 0.29       | 0.00       |
| Tyr     | 123590  | 0.25          | 0.00          | 0.01          | 0.00          | 0.27             | 0.00             | 0.00             | 0.00             | 0.07           | 0.00           | 0.02           | 0.00           | 0.12       | 0.01       | 0.25       | 0.00       |
| Total   | 3828171 | 0.16          | 0.00          | 0.01          | 0.00          | 0.25             | 0.01             | 0.00             | 0.01             | 0.04           | 0.00           | 0.01           | 0.00           | 0.11       | 0.06       | 0.32       | 0.02       |

Most researches focus on the special conformations of amino acids distributed in special regions of the classical Ramachandran map. Experimental data illustrate that the conformational structures in mammal prefer locating in  $\beta_{L-1}$ ,  $\epsilon_{L-1}$ ,  $\gamma_L$  and  $\alpha_L$ , which consist well with their distribution in Ramachandran map, but there are also various configurations of amino acids found in other regions which close to and far away from the empirical regions. In Table S2, taking Gly, which is characterized by its most flexible backbone torsions, as an example, its distribution covers all 16 regions.

Equation S1 Hydrogen bonding fitting function

For hydrogen-bond regions, the  $k_{ij}$  is replaced by a  $k_{HB}(R_{H,lp})$  (Eq. S1) function to

depict the electrostatic interaction between the hydrogen atom and the lone-pair electron, and its form is as follows:

$$k_{HB}(R_{H,lp}) = 0.570 - \frac{B}{1 + \exp\left(\frac{R_{H,lp} - C}{D}\right)} \quad (\text{S1})$$

In Eq. S1,  $R_{H,lp}$  means the distance between H atom and lone-pair, and  $B$ ,  $C$  and  $D$  means the span, balance distance and gradient of this function respectively (Table S2).

Table S2 Parameters in the function  $k_{HB}(R_{H,lp})$  for different H,  $lp$  pairs

| H, $lp$ pairs                                                          | $B$    | $C$    | $D$    |
|------------------------------------------------------------------------|--------|--------|--------|
| $lp$ of Alcohol O in Ser and Thr and Amide H                           | 0.0435 | 1.6032 | 0.0150 |
| $lp$ of Alcohol O in Ser and Thr and Alcohol H in Ser and Thr          | 1.1054 | 1.4843 | 0.5308 |
| $lp$ of Amide O and Amide H                                            | 0.0496 | 1.3978 | 0.1034 |
| $lp$ of Amide O and Thiol H in Cys                                     | 0.1206 | 1.3998 | 0.1758 |
| $lp$ of Amide O and Alcohol H in Ser and Thr                           | 0.0127 | 1.9482 | 0.0434 |
| $lp$ of Amide O and Phenol H in Tyr                                    | 0.0920 | 1.0988 | 0.0190 |
| $lp$ of Amide O and H in $\text{H}_2\text{NC}=\text{O}$ of Asn and Gln | 0.0792 | 2.0874 | 0.3202 |
| $lp$ of Amide O and H in $\text{NH}^{3+}$ of Lys                       | 0.0487 | 1.3008 | 0.0794 |
| $lp$ of Amide O and H in guanidinium ions of Arg                       | 0.0427 | 1.5642 | 0.0420 |
| $lp$ of Amide O and HN in His(+)                                       | 0.0470 | 1.0970 | 0.0560 |
| $lp$ of O in Asp and Glu and Amide H                                   | 0.0130 | 1.5875 | 0.0230 |
| $lp$ of Thiol and Thioether S and Amide H                              | 0.0043 | 1.5201 | 0.0033 |

Table S3  $J$ -coupling constants and their Karplus parameterizations used in this study

| $J$ -Coupling                        | Parameterization                                                                                                                                                                                                              |
|--------------------------------------|-------------------------------------------------------------------------------------------------------------------------------------------------------------------------------------------------------------------------------|
| ${}^3J(\text{H}_N, \text{H}_\alpha)$ | $7.09\cos^2(\varphi-60^\circ)-1.42\cos(\varphi-60^\circ)+1.55$                                                                                                                                                                |
| ${}^3J(\text{H}_N, \text{C}')$       | $4.29\cos^2(\varphi+180^\circ)-1.01\cos(\varphi-60^\circ)$                                                                                                                                                                    |
| ${}^3J(\text{H}_\alpha, \text{C}')$  | $3.72\cos^2(\varphi+120^\circ)-2.18\cos(\varphi+120^\circ)+1.28$                                                                                                                                                              |
| ${}^3J(\text{C}', \text{C}')$        | $1.36\cos^2(\varphi)-0.93\cos(\varphi)+0.60$                                                                                                                                                                                  |
| ${}^3J(\text{H}_N, \text{C}_\beta)$  | $3.06\cos^2(\varphi+60^\circ)-0.74\cos(\varphi+60^\circ)+0.13$                                                                                                                                                                |
| ${}^1J(\text{N}, \text{C}_\alpha)$   | $1.70\cos^2(\psi)-0.98\cos(\psi)+9.51$                                                                                                                                                                                        |
| ${}^2J(\text{N}, \text{C}_\alpha)$   | $-0.66\cos^2(\psi_{i-1})-1.52\cos(\psi_{i-1})+7.85$                                                                                                                                                                           |
| ${}^3J(\text{H}_N, \text{C}_\alpha)$ | $-0.23\cos(\varphi)-0.20\cos(\psi_{i-1})+0.07\sin(\varphi)+0.08\sin(\psi_{i-1})+0.07\cos(\varphi)\cos(\psi_{i-1})+0.12\cos(\varphi)\sin(\psi_{i-1})-0.08\sin(\varphi)\cos(\psi_{i-1})-0.14\sin(\varphi)\sin(\psi_{i-1})+0.54$ |

In Table S3, all parameterizations are original without any modified to be consistent

with most studies.

Table S4 The details of transfer by crossing  $\varphi=0^\circ$  of Ala-, Gly- and Val-dipeptide and tripeptide obtained by different methods

|                |            | B3LYP/6-311++G(d,p) <sup>a</sup> | ABEEM <sup>b</sup> | OPLS/AA                                                                                                                              | AMBER99sb | CHARMM27 | AMOEBa |
|----------------|------------|----------------------------------|--------------------|--------------------------------------------------------------------------------------------------------------------------------------|-----------|----------|--------|
| Dipeptide      |            | None                             | None               | Val:7( $\alpha_D \rightarrow \gamma_L$ )<br>c                                                                                        | None      | None     | None   |
| Tripeptid<br>e | N-terminal | None                             | None               | Ala:1( $\alpha_D \rightarrow \epsilon_L$ )<br>Val:1( $\alpha_D \rightarrow \epsilon_L$ )<br>Val:1( $\alpha_D \rightarrow \gamma_L$ ) | None      | None     | None   |
|                | C-terminal | None                             | None               | Val:1( $\alpha_D \rightarrow \gamma_L$ )                                                                                             | None      | None     | None   |

<sup>a</sup>: All minima selected from scan by B3LYP/6-311++G(d,p) were optimized by the same level, and none Ala, Gly and Val dipeptide and tripeptide crossed  $\varphi=0^\circ$ . <sup>b</sup>: All minima selected from scan by B3LYP/6-311++G(d,p) were minimized by force field, and ABEEM, AMBER99sb, CHARMM27 and AMOEBA captured none crossing of  $\varphi=0^\circ$ . <sup>c</sup>: Val:7( $\alpha_D \rightarrow \gamma_L$ ) means that in Val-dipeptides, total 7 times of the transformation from  $\alpha_D$  to  $\gamma_L$ . Only OPLS/AA obtained a few times, and the torsions were from (56.08°,41.09°) to (-78.64°,78.39°), from (51.07°,41.09°) to (-78.69°,78.30°), from (51.06°,41.11°) to (-78.67°,78.29°), from (51.08°,41.10°) to (-78.65°,78.61°), from (51.08°,41.11°) to (-78.72°,78.51°), from (51.08°,41.09°) to (-78.65°,78.69°), from (51.08°,41.10°) to (-78.71°,78.38°), from (62.3°,29.7°) to (-64.0°,128.5°), from (48.1°,42.8°) to (-64.8°,136.4°), from (54.0°,36.7°) to (-79.5°,74.4°), and from (52.1°,41.3°) to (-78.5°,72.4°). Though these transfers, there are still stable conformations that locate in  $\alpha_D$  successfully, such as a05.

Table S5. The backbone torsions (°) of all Gly- and Val-dipeptides conformations obtained by B3LYP/6-311++G(d,p), ABEEM, OPLS/AA, AMBER99sb, CHARMM27, and AMOEBA and MAD values (°) obtained by each FF compared with those of B3LYP/6-311++G(d,p)

| Model | B3LYP/6-311++G(d,p) | ABEEM | OPLS/AA | AMBER99sb | CHARMM27 | AMOEBa |
|-------|---------------------|-------|---------|-----------|----------|--------|
|-------|---------------------|-------|---------|-----------|----------|--------|

|     | $\varphi$ | $\psi$ | $\varphi$ | $\psi$ | $\varphi$ | $\psi$  | $\varphi$ | $\psi$  | $\varphi$ | $\psi$  | $\varphi$ | $\psi$ |        |
|-----|-----------|--------|-----------|--------|-----------|---------|-----------|---------|-----------|---------|-----------|--------|--------|
| Gly | g01       | 82.4   | -70.4     | 86.1   | -70.5     | 79.93   | -69.64    | 74.71   | -62.51    | 83.08   | -68.02    | 81.9   | -74.1  |
|     | g02       | 112.7  | -17.0     | 111.3  | -20.1     | 79.97   | -69.59    | 74.70   | -62.63    | 82.99   | -67.95    | 105.6  | -11.8  |
|     | g03       | -112.9 | 17.0      | -121.4 | 18.8      | -79.94  | 69.63     | -74.72  | 62.46     | -82.93  | 67.89     | -105.6 | 11.8   |
|     | g04       | -82.4  | 70.4      | -86.1  | 70.5      | -79.94  | 69.64     | -74.71  | 62.45     | -83.04  | 68.03     | -81.8  | 74.2   |
|     | g05       | 179.5  | 179.5     | 178.1  | 177.8     | -179.92 | 179.98    | -179.91 | -179.98   | -179.91 | 179.92    | -170.2 | -179.7 |
|     | MAD       | --     |           | 2.6    |           | 17.8    |           | 20.0    |           | 16.8    |           | 4.5    |        |
| Val | v01       | 63.3   | -40.3     | 77.4   | -47.7     | 55.5    | -52.1     | 54.6    | -42.7     | 58.5    | -56.2     | 66.5   | -40.0  |
|     | v02       | -116.9 | 8.7       | -112.0 | 12.5      | -78.6   | 78.6      | -78.8   | 69.6      | -78.4   | -27.2     | -80.7  | -15.0  |
|     | v03       | -157.1 | -42.5     | -154.3 | -40.9     | -151.0  | -64.5     | -78.7   | 69.7      | -149.8  | -60.5     | -163.0 | -36.1  |
|     | v04       | 51.1   | 41.1      | 47.7   | 31.3      | -78.7   | 78.3      | 54.6    | -42.7     | 58.4    | -56.2     | 58.5   | 29.2   |
|     | v05       | -84.7  | 76.4      | -83.2  | 76.8      | -78.6   | 78.6      | -78.7   | 70.0      | -82.2   | 82.5      | -82.2  | 72.4   |
|     | v06       | -150.1 | 154.1     | -153.2 | 148.2     | -145.7  | 159.1     | -147.8  | 151.6     | -142.3  | 150.5     | -146.1 | 155.7  |
|     | MAD       | --     |           | 4.9    |           | 28.4    |           | 33.8    |           | 20.4    |           | 8.9    |        |

Table S6 The number of conformation and mean absolute deviation (MAD/°) of dihedral angles at the backbones of Gly and Val dipeptides and tripeptides and Ala tripeptides and tetrapeptides in details obtained by the OPLS/AA, AMBER99sb, CHARMM27, AMOEBA, and ABEEM methods compared with B3LYP/6-311++G(d,p)

| Mode         | Type                               | B3LYP/6-311++G(d,p)                             | ABEEM <sup>d</sup>                         | OPLS/AA                                            | AMBER99sb                                          | CHARMM27                                           | AMOEBA                                            |
|--------------|------------------------------------|-------------------------------------------------|--------------------------------------------|----------------------------------------------------|----------------------------------------------------|----------------------------------------------------|---------------------------------------------------|
| Dipeptide    | Gly                                | Number/MAD of all conformations                 |                                            | <u>5</u> /17.8                                     | <u>5</u> /20.0                                     | <u>5</u> /16.8                                     | <u>5</u> /4.5                                     |
|              |                                    | Number/MAD of stable conformations              | <u>5</u> /--                               | <u>5</u> /2.6                                      | <u>3</u> /1.3                                      | <u>3</u> /5.4                                      | <u>3</u> /1.2                                     |
|              | Val                                | Number/MAD of all conformations                 |                                            | <u>6</u> /28.4                                     | <u>6</u> /33.8                                     | <u>6</u> /20.4                                     | <u>6</u> /8.9                                     |
|              |                                    | Number/MAD of stable conformations              | <u>6</u> /--                               | <u>6</u> /4.9                                      | <u>4</u> /8.2                                      | <u>3</u> /4.7                                      | <u>4</u> /8.3                                     |
| Ala          | Ala                                | Number/MAD <sup>c</sup> of all conformations    |                                            | <u>30</u> / ( $\frac{25.5 / 24.6}{25.1}$ )         | <u>30</u> / ( $\frac{24.8 / 24.7}{24.7}$ )         | <u>30</u> / ( $\frac{25.8 / 22.1}{23.9}$ )         | <u>30</u> / ( $\frac{9.5 / 7.6}{8.5}$ )           |
|              |                                    | Number/MAD <sup>c</sup> of stable conformations | <u>30</u> /--                              | <u>30</u> / ( $\frac{5.5 / 3.9}{4.7}$ )            | <u>14</u> / ( $\frac{11.4 / 9.4}{10.4}$ )          | <u>14</u> / ( $\frac{10.9 / 9.9}{9.9}$ )           | <u>12</u> / ( $\frac{10.6 / 10.3}{10.4}$ )        |
|              | Gly                                | Number/MAD of all conformations                 |                                            | <u>25</u> / ( $\frac{17.7 / 25.8}{21.8}$ )         | <u>25</u> / ( $\frac{19.5 / 27.5}{23.5}$ )         | <u>25</u> / ( $\frac{18.1 / 19.8}{19.0}$ )         | <u>25</u> / ( $\frac{7.3 / 10.8}{9.0}$ )          |
|              |                                    | Number/MAD of stable conformations              | <u>25</u> /--                              | <u>25</u> / ( $\frac{8.0 / 6.6}{7.3}$ )            | <u>7</u> / ( $\frac{2.3 / 2.9}{2.6}$ )             | <u>9</u> / ( $\frac{6.6 / 10.7}{8.6}$ )            | <u>9</u> / ( $\frac{3.1 / 3.9}{3.5}$ )            |
| Val          | Number/MAD of all conformations    |                                                 | <u>28</u> / ( $\frac{25.6 / 33.8}{29.7}$ ) | <u>28</u> / ( $\frac{13.0 / 23.3}{18.1}$ )         | <u>28</u> / ( $\frac{25.3 / 25.7}{25.5}$ )         | <u>28</u> / ( $\frac{12.5 / 15.3}{13.9}$ )         |                                                   |
|              | Number/MAD of stable conformations | <u>28</u> /--                                   | <u>28</u> / ( $\frac{6.7 / 6.6}{6.7}$ )    | <u>13</u> / ( $\frac{10.8 / 10.6}{10.7}$ )         | <u>13</u> / ( $\frac{6.1 / 8.2}{7.1}$ )            | <u>11</u> / ( $\frac{7.9 / 15.6}{11.7}$ )          | <u>19</u> / ( $\frac{8.2 / 7.2}{7.7}$ )           |
| Tetrapeptide | Ala                                | Number/MAD <sup>c</sup> of all conformations    |                                            | <u>169</u> / ( $\frac{31.8 / 21.5 / 25.2}{26.2}$ ) | <u>169</u> / ( $\frac{30.2 / 24.3 / 29.4}{27.9}$ ) | <u>169</u> / ( $\frac{30.2 / 24.2 / 27.4}{27.3}$ ) | <u>169</u> / ( $\frac{10.8 / 9.6 / 10.4}{10.3}$ ) |
|              |                                    | Number/MAD <sup>c</sup> of stable conformations | <u>169</u> /--                             | <u>169</u> / ( $\frac{4.5 / 4.8 / 3.8}{4.4}$ )     | <u>61</u> / ( $\frac{11.8 / 12.6 / 12.1}{12.2}$ )  | <u>53</u> / ( $\frac{10.5 / 10.4 / 11.4}{10.8}$ )  | <u>50</u> / ( $\frac{11.7 / 11.8 / 14.6}{12.7}$ ) |

<sup>a</sup>: for B3LYP/6-311++G(d,p), all conformations equal to stable conformations, and the conformations are standard conformations, while for each FF, it donates the results from further optimization of every conformation processed by each FF, and MAD means the mean absolutely deviation value of  $\varphi$  and  $\psi$  compared with the standard conformations; <sup>b</sup>: for each FF, stable conformations mean the conformation locate around the standard conformation successfully by each FF, and the MAD



donates the corresponding deviation value of dihedral angles between stable conformations successfully located by each FF and their standard conformations; <sup>c</sup>: the MAD includes three values, which are the average deviation of  $\varphi$  and  $\psi$  at N-terminal, C-terminal (above the line) and all two pairs compared with the standard conformations (below the line); <sup>d</sup>: the FF successfully locates all stable conformations, so the number and MAD are not listed repeatedly; <sup>e</sup>: values above the line donate MAD of three pairs of  $\varphi$  and  $\psi$  belong to N-terminal, central and C-terminal residue in turn respectively, and the value below donate the average of all  $\varphi$  and  $\psi$  compared with the standard conformations.

Table S7 The backbone torsions ( $^{\circ}$ ) of Ala stable conformations obtained by B3LYP/6-311++G(d,p), ABEEM, OPLS/AA, AMBER99sb, CHARMM27, and AMOEBA, the number of conformations that located by each force field and the MAD with B3LYP/6-311++G(d,p)

| Model | B3LYP/6-311++(d,p) |        | ABEEM     |        | OPLS/AA   |        | AMBER99sb |        | CHARMM27  |        | AMOEBA    |        |        |
|-------|--------------------|--------|-----------|--------|-----------|--------|-----------|--------|-----------|--------|-----------|--------|--------|
|       | $\varphi$          | $\psi$ | $\varphi$ | $\psi$ | $\varphi$ | $\psi$ | $\varphi$ | $\psi$ | $\varphi$ | $\psi$ | $\varphi$ | $\psi$ |        |
| Ala   | a01                | 73.1   | -57.3     | 78.2   | -58.8     | 67.7   | -61.2     | 59.8   | -55.4     | 69.7   | -67.6     | 72.1   | -53.1  |
|       | a02                | -164.5 | -44.8     | -158.5 | -45.7     | --     | --        | -149.7 | -57.0     | --     | --        | -167.4 | -35.5  |
|       | a03                | -115.2 | 13.7      | -81.2  | 17.0      | --     | --        | --     | --        | --     | --        | -116.2 | 10.6   |
|       | a04                | -83.5  | 76.0      | -83.8  | 76.1      | -79.3  | 76.9      | -76.4  | 69.0      | -81.4  | 70.6      | -83.2  | 76.3   |
|       | a05                | 72.1   | 19.6      | 80.9   | 15.2      | 49.3   | 39.2      | --     | --        | --     | --        | 66.1   | 30.1   |
|       | a06                | -154.6 | 160.2     | -154.5 | 158.2     | -147.3 | 165.2     | -147.2 | 163.3     | -151.3 | 170.6     | -155.7 | 162.0  |
|       | Number             | 6      |           | 6      |           | 4      |           | 4      |           | 3      |           | 6      |        |
| MAD   | --                 |        | 5.2       |        | 8.6       |        | 8.3       |        | 5.8       |        | 3.5       |        |        |
| Gly   | g01                | 82.4   | -70.4     | 86.0   | -70.6     | 79.9   | -69.6     | 74.7   | -62.5     | 83.1   | -68.0     | 81.9   | -74.1  |
|       | g02                | 112.7  | -17.0     | 111.3  | -20.1     | --     | --        | --     | --        | --     | --        | 105.6  | -11.8  |
|       | g03                | -112.9 | 17.0      | -121.4 | 18.8      | --     | --        | --     | --        | --     | --        | -105.6 | 11.8   |
|       | g04                | -82.4  | 70.4      | -86.1  | 70.5      | -79.9  | 69.6      | -74.7  | 62.5      | -83.0  | 68.0      | -81.8  | 74.2   |
|       | g05                | 179.5  | 179.5     | 178.1  | 177.8     | -179.9 | 180.0     | -179.9 | -180.0    | -179.9 | 179.9     | -170.2 | -179.7 |
|       | Number             | 5      |           | 5      |           | 3      |           | 3      |           | 3      |           | 5      |        |
|       | MAD                | --     |           | 2.6    |           | 1.3    |           | 5.4    |           | 1.2    |           | 4.5    |        |
| Val   | v01                | 63.3   | -40.3     | 77.4   | -47.7     | 55.5   | -52.1     | 54.6   | -42.7     | 58.5   | -56.2     | 66.5   | -40.0  |
|       | v02                | -116.9 | 8.7       | -112.0 | 12.5      | --     | --        | --     | --        | --     | --        | --     | --     |
|       | v03                | -157.1 | -42.5     | -154.3 | -40.9     | -151.0 | -64.5     | --     | --        | -149.8 | -60.5     | -163.0 | -36.1  |
|       | v04                | 51.1   | 41.1      | 47.7   | 31.3      | --     | --        | --     | --        | --     | --        | 58.5   | 29.2   |
|       | v05                | -84.7  | 76.4      | -83.2  | 76.8      | -78.6  | 78.6      | -78.7  | 70.0      | -82.2  | 82.5      | -82.2  | 72.4   |
|       | v06                | -150.1 | 154.1     | -153.2 | 148.2     | -145.7 | 159.1     | -147.8 | 151.6     | -142.3 | 150.5     | -146.1 | 155.7  |
|       | Number             | 6      |           | 6      |           | 4      |           | 3      |           | 4      |           | 5      |        |
| MAD   | --                 |        | 4.9       |        | 8.2       |        | 4.7       |        | 8.3       |        | 4.7       |        |        |

In Table S7, lower deviation values are obtained from the results after classification, because the deviation values of the missed conformation contribute none to them, and only the conformations successfully obtained take part in the compare.

Table S8 The number, value ( $^{\circ}$ ) and mean absolute deviation (MAD/ $^{\circ}$ ) of dihedral angles at backbone of the Ala-tripeptide's stable conformations by B3LYP/6-311++G(d,p), OPLS/AA, AMBER99sb, CHARMM27, AMOEBA, and ABEEM methods

| Tripeptide  | Method              | $\varphi_1$ | $\psi_1$ | $\varphi_2$ | $\psi_2$ | MAD  |
|-------------|---------------------|-------------|----------|-------------|----------|------|
| Ala-Ala-001 | B3LYP/6-311++G(d,p) | -162.9      | -45.2    | -156.2      | 159.7    | --   |
|             | ABEEM               | -162.7      | -47.0    | -154.6      | 160.1    | 1.0  |
|             | OPLS/AA             | --          | --       | --          | --       | --   |
|             | AMBER99sb           | -147.9      | -36.7    | -140.2      | 166.3    | 11.5 |

|             |                     |        |       |        |       |      |
|-------------|---------------------|--------|-------|--------|-------|------|
|             | CHARMM27            | --     | --    | --     | --    | --   |
|             | AMOEBA              | -167.4 | -35.1 | -149.4 | 168.1 | 7.4  |
| Ala-Ala-002 | B3LYP/6-311++G(d,p) | -165.9 | -46.4 | -84.7  | 78.5  | --   |
|             | ABEEM               | -168.4 | -48.6 | -81.5  | 77.7  | 2.2  |
|             | OPLS/AA             | -150.4 | -66.6 | -75.5  | 84.7  | 12.7 |
|             | AMBER99sb           | -147.0 | -44.9 | -73.9  | 81.7  | 8.6  |
|             | CHARMM27            | --     | --    | --     | --    | --   |
|             | AMOEBA              | -167.2 | -37.9 | -80.7  | 83.9  | 4.8  |
| Ala-Ala-003 | B3LYP/6-311++G(d,p) | -167.1 | -48.8 | 72.3   | 14.9  | --   |
|             | ABEEM               | -156.0 | -55.2 | 78.5   | 12.0  | 6.6  |
|             | OPLS/AA             | --     | --    | --     | --    | --   |
|             | AMBER99sb           | --     | --    | --     | --    | --   |
|             | CHARMM27            | --     | --    | --     | --    | --   |
|             | AMOEBA              | --     | --    | --     | --    | --   |
| Ala-Ala-004 | B3LYP/6-311++G(d,p) | -165.4 | -44.8 | 72.1   | -56.4 | --   |
|             | ABEEM               | -168.1 | -51.2 | 78.2   | -57.8 | 4.1  |
|             | OPLS/AA             | --     | --    | --     | --    | --   |
|             | AMBER99sb           | --     | --    | --     | --    | --   |
|             | CHARMM27            | --     | --    | --     | --    | --   |
|             | AMOEBA              | -167.9 | -35.7 | 75.6   | -57.1 | 4.0  |
| Ala-Ala-005 | B3LYP/6-311++G(d,p) | -153.1 | 159.0 | -162.1 | -49.1 | --   |
|             | ABEEM               | -155.1 | 156.8 | -162.8 | -51.6 | 1.9  |
|             | OPLS/AA             | --     | --    | --     | --    | --   |
|             | AMBER99sb           | -146.8 | 163.6 | -148.0 | -41.9 | 8.0  |
|             | CHARMM27            | --     | --    | --     | --    | --   |
|             | AMOEBA              | -154.7 | 163.1 | -166.6 | -35.7 | 5.9  |
| Ala-Ala-006 | B3LYP/6-311++G(d,p) | -155.4 | 161.1 | -155.8 | 160.5 | --   |
|             | ABEEM               | -155.0 | 159.3 | -153.7 | 158.1 | 1.7  |
|             | OPLS/AA             | -148.7 | 167.1 | -144.7 | 164.4 | 6.9  |
|             | AMBER99sb           | -147.2 | 163.7 | -146.7 | 162.4 | 5.4  |
|             | CHARMM27            | -150.6 | 173.1 | -150.2 | 172.8 | 8.6  |
|             | AMOEBA              | -155.8 | 168.0 | -152.0 | 164.9 | 3.9  |
| Ala-Ala-007 | B3LYP/6-311++G(d,p) | -155.1 | 163.8 | -112.1 | 10.0  | --   |
|             | ABEEM               | -153.8 | 139.0 | -83.0  | 11.0  | 14.0 |
|             | OPLS/AA             | --     | --    | --     | --    | --   |
|             | AMBER99sb           | --     | --    | --     | --    | --   |
|             | CHARMM27            | --     | --    | --     | --    | --   |
|             | AMOEBA              | -156.7 | 171.3 | -109.4 | 10.5  | 3.1  |
| Ala-Ala-008 | B3LYP/6-311++G(d,p) | -154.7 | 156.8 | -83.5  | 77.0  | --   |
|             | ABEEM               | -153.3 | 155.2 | -82.1  | 77.1  | 1.1  |
|             | OPLS/AA             | -146.6 | 162.6 | -80.0  | 71.8  | 5.7  |
|             | AMBER99sb           | -146.8 | 160.3 | -77.2  | 58.8  | 9.0  |
|             | CHARMM27            | -148.3 | 169.1 | -81.7  | 73.7  | 6.0  |
|             | AMOEBA              | -155.8 | 162.2 | -83.6  | 79.9  | 2.4  |

|             |                     |        |       |        |       |      |
|-------------|---------------------|--------|-------|--------|-------|------|
| Ala-Ala-009 | B3LYP/6-311++G(d,p) | -153.6 | 156.6 | 72.9   | 18.6  | --   |
|             | ABEEM               | -158.0 | 148.9 | 77.7   | 16.5  | 4.7  |
|             | OPLS/AA             | -142.8 | 168.0 | 53.3   | 37.5  | 15.2 |
|             | AMBER99sb           | --     | --    | --     | --    | --   |
|             | CHARMM27            | --     | --    | --     | --    | --   |
|             | AMOEBA              | -152.8 | 160.0 | 64.9   | 33.1  | 6.7  |
| Ala-Ala-010 | B3LYP/6-311++G(d,p) | -153.8 | 155.4 | 74.2   | -55.6 | --   |
|             | ABEEM               | -155.2 | 150.2 | 78.5   | -57.3 | 3.2  |
|             | OPLS/AA             | -146.4 | 167.9 | 67.9   | -57.7 | 7.1  |
|             | AMBER99sb           | -146.1 | 165.1 | 60.2   | -47.7 | 9.8  |
|             | CHARMM27            | -150.3 | 171.1 | 70.3   | -68.6 | 9.0  |
|             | AMOEBA              | -152.7 | 163.7 | 73.7   | -55.6 | 2.5  |
| Ala-Ala-011 | B3LYP/6-311++G(d,p) | -116.1 | 10.2  | -165.0 | -42.5 | --   |
|             | ABEEM               | -87.4  | 1.2   | -158.6 | -45.3 | 11.8 |
|             | OPLS/AA             | --     | --    | --     | --    | --   |
|             | AMBER99sb           | --     | --    | --     | --    | --   |
|             | CHARMM27            | --     | --    | --     | --    | --   |
|             | AMOEBA              | --     | --    | --     | --    | --   |
| Ala-Ala-012 | B3LYP/6-311++G(d,p) | -108.9 | 4.7   | -155.2 | 157.4 | --   |
|             | ABEEM               | -90.8  | 8.5   | -159.1 | 152.6 | 7.7  |
|             | OPLS/AA             | -70.1  | -26.9 | -130.8 | 159.1 | 24.1 |
|             | AMBER99sb           | -71.0  | -9.9  | -147.0 | 159.4 | 15.7 |
|             | CHARMM27            | -79.5  | -31.9 | -152.4 | 168.0 | 19.8 |
|             | AMOEBA              | -82.1  | -15.4 | -156.1 | 158.6 | 12.2 |
| Ala-Ala-013 | B3LYP/6-311++G(d,p) | -74.8  | -11.1 | -97.8  | 4.9   | --   |
|             | ABEEM               | -68.4  | -22.7 | -85.1  | 5.2   | 7.7  |
|             | OPLS/AA             | --     | --    | --     | --    | --   |
|             | AMBER99sb           | -60.6  | -19.9 | -76.9  | -1.3  | 12.5 |
|             | CHARMM27            | -64.3  | -18.9 | -84.7  | -5.7  | 10.4 |
|             | AMOEBA              | -74.2  | -11.8 | -91.0  | -2.1  | 3.8  |
| Ala-Ala-014 | B3LYP/6-311++G(d,p) | -112.5 | 6.0   | -83.5  | 73.7  | --   |
|             | ABEEM               | -108.2 | 9.9   | -83.6  | 74.2  | 2.2  |
|             | OPLS/AA             | --     | --    | --     | --    | --   |
|             | AMBER99sb           | --     | --    | --     | --    | --   |
|             | CHARMM27            | --     | --    | --     | --    | --   |
|             | AMOEBA              | -129.4 | 9.4   | -85.3  | 77.8  | 6.5  |
| Ala-Ala-015 | B3LYP/6-311++G(d,p) | -111.0 | 10.7  | 74.1   | -57.3 | --   |
|             | ABEEM               | -101.8 | 8.0   | 79.4   | -60.5 | 5.1  |
|             | OPLS/AA             | --     | --    | --     | --    | --   |
|             | AMBER99sb           | --     | --    | --     | --    | --   |
|             | CHARMM27            | --     | --    | --     | --    | --   |
|             | AMOEBA              | -120.4 | 11.7  | 73.0   | -68.4 | 5.6  |
| Ala-Ala-016 | B3LYP/6-311++G(d,p) | -79.8  | 74.7  | -174.8 | -34.7 | --   |
|             | ABEEM               | -79.2  | 75.1  | -174.5 | -33.2 | 0.7  |

|             |                     |       |        |        |       |      |
|-------------|---------------------|-------|--------|--------|-------|------|
|             | OPLS/AA             | -74.7 | 75.8   | -158.8 | -48.6 | 9.0  |
|             | AMBER99sb           | --    | --     | --     | --    | --   |
|             | CHARMM27            | -77.8 | 70.6   | -142.8 | -63.1 | 16.6 |
|             | AMOEBA              | -78.2 | 69.8   | -168.6 | -31.4 | 4.0  |
| Ala-Ala-017 | B3LYP/6-311++G(d,p) | -84.0 | 74.9   | -116.9 | 7.6   | --   |
|             | ABEEM               | -83.6 | 73.2   | -112.7 | 11.2  | 2.5  |
|             | OPLS/AA             | --    | --     | --     | --    | --   |
|             | AMBER99sb           | --    | --     | --     | --    | --   |
|             | CHARMM27            | --    | --     | --     | --    | --   |
|             | AMOEBA              | --    | --     | --     | --    | --   |
| Ala-Ala-018 | B3LYP/6-311++G(d,p) | -84.3 | 72.2   | -84.6  | 72.2  | --   |
|             | ABEEM               | -84.5 | 72.8   | -83.2  | 72.0  | 0.6  |
|             | OPLS/AA             | -80.0 | 73.4   | -77.5  | 67.6  | 4.3  |
|             | AMBER99sb           | -77.2 | 62.5   | -76.4  | 54.0  | 10.8 |
|             | CHARMM27            | -80.5 | 73.1   | -80.0  | 68.2  | 3.3  |
|             | AMOEBA              | -82.5 | 69.5   | -82.0  | 77.1  | 3.0  |
| Ala-Ala-019 | B3LYP/6-311++G(d,p) | -85.7 | 67.4   | 70.6   | 19.4  | --   |
|             | ABEEM               | -83.0 | 69.3   | 71.7   | 13.5  | 2.9  |
|             | OPLS/AA             | --    | --     | --     | --    | --   |
|             | AMBER99sb           | --    | --     | --     | --    | --   |
|             | CHARMM27            | --    | --     | --     | --    | --   |
|             | AMOEBA              | --    | --     | --     | --    | --   |
| Ala-Ala-020 | B3LYP/6-311++G(d,p) | -83.7 | 72.2   | 70.8   | -55.5 | --   |
|             | ABEEM               | -84.0 | 71.2   | 74.7   | -56.2 | 1.5  |
|             | OPLS/AA             | -79.5 | 70.7   | 66.3   | -60.4 | 3.8  |
|             | AMBER99sb           | -77.8 | 60.2   | 58.9   | -56.9 | 7.8  |
|             | CHARMM27            | -81.3 | 66.5   | 69.1   | -67.2 | 5.4  |
|             | AMOEBA              | -80.2 | 79.8   | 75.5   | -52.1 | 4.8  |
| Ala-Ala-021 | B3LYP/6-311++G(d,p) | 55.7  | -127.6 | -100.7 | 12.6  | --   |
|             | ABEEM               | 75.8  | -122.2 | -104.2 | 17.3  | 8.4  |
|             | OPLS/AA             | 59.9  | -151.0 | -82.6  | 62.8  | 24.0 |
|             | AMBER99sb           | 48.4  | -134.5 | -77.1  | 7.3   | 10.8 |
|             | CHARMM27            | --    | --     | --     | --    | --   |
|             | AMOEBA              | 52.2  | -124.5 | -103.8 | 12.4  | 2.4  |
| Ala-Ala-022 | B3LYP/6-311++G(d,p) | 69.8  | 22.4   | -158.9 | 157.0 | --   |
|             | ABEEM               | 79.4  | 14.5   | -153.4 | 160.2 | 6.6  |
|             | OPLS/AA             | --    | --     | --     | --    | --   |
|             | AMBER99sb           | --    | --     | --     | --    | --   |
|             | CHARMM27            | --    | --     | --     | --    | --   |
|             | AMOEBA              | 66.5  | 29.4   | -156.5 | 164.8 | 5.1  |
| Ala-Ala-023 | B3LYP/6-311++G(d,p) | 68.2  | 27.0   | -117.6 | 11.6  | --   |
|             | ABEEM               | 79.4  | -3.7   | -83.6  | 16.2  | 20.1 |
|             | OPLS/AA             | --    | --     | --     | --    | --   |
|             | AMBER99sb           | --    | --     | --     | --    | --   |

|             |                     |      |       |        |       |      |
|-------------|---------------------|------|-------|--------|-------|------|
|             | CHARMM27            | --   | --    | --     | --    | --   |
|             | AMOEBA              | 64.6 | 31.9  | -111.9 | 12.9  | 3.9  |
| Ala-Ala-024 | B3LYP/6-311++G(d,p) | 71.7 | 19.4  | -86.0  | 75.2  | --   |
|             | ABEEM               | 67.4 | 16.9  | -82.0  | 75.0  | 2.7  |
|             | OPLS/AA             | 51.7 | 40.0  | -79.7  | 72.1  | 12.5 |
|             | AMBER99sb           | --   | --    | --     | --    | --   |
|             | CHARMM27            | --   | --    | --     | --    | --   |
|             | AMOEBA              | 65.3 | 31.6  | -84.5  | 79.6  | 6.1  |
| Ala-Ala-025 | B3LYP/6-311++G(d,p) | 62.3 | 29.7  | 68.1   | 16.3  | --   |
|             | ABEEM               | 64.3 | 25.2  | 73.6   | 11.1  | 4.3  |
|             | OPLS/AA             | --   | --    | --     | --    | --   |
|             | AMBER99sb           | 48.4 | 33.5  | 55.6   | 12.8  | 8.4  |
|             | CHARMM27            | 57.7 | 17.5  | 70.2   | 13.4  | 5.4  |
|             | AMOEBA              | 59.6 | 31.5  | 70.1   | 8.2   | 3.6  |
| Ala-Ala-026 | B3LYP/6-311++G(d,p) | 69.1 | 29.1  | 72.7   | -58.1 | --   |
|             | ABEEM               | 68.6 | 21.6  | 79.6   | -58.3 | 3.8  |
|             | OPLS/AA             | 47.6 | 54.5  | 69.3   | -55.8 | 13.2 |
|             | AMBER99sb           | --   | --    | --     | --    | --   |
|             | CHARMM27            | --   | --    | --     | --    | --   |
|             | AMOEBA              | --   | --    | --     | --    | --   |
| Ala-Ala-027 | B3LYP/6-311++G(d,p) | 75.1 | -49.9 | -107.9 | 6.6   | --   |
|             | ABEEM               | 79.0 | -57.3 | -102.4 | 10.4  | 5.1  |
|             | OPLS/AA             | --   | --    | --     | --    | --   |
|             | AMBER99sb           | --   | --    | --     | --    | --   |
|             | CHARMM27            | 62.6 | -86.6 | -86.6  | -24.3 | 25.4 |
|             | AMOEBA              | --   | --    | --     | --    | --   |
| Ala-Ala-028 | B3LYP/6-311++G(d,p) | 73.2 | -57.3 | -82.7  | 74.5  | --   |
|             | ABEEM               | 75.3 | -58.3 | -81.8  | 73.8  | 1.2  |
|             | OPLS/AA             | 68.7 | -57.2 | -75.5  | 74.3  | 3.0  |
|             | AMBER99sb           | 60.6 | -43.9 | -74.9  | 67.3  | 10.3 |
|             | CHARMM27            | 69.8 | -64.9 | -80.4  | 66.7  | 5.3  |
|             | AMOEBA              | 71.8 | -66.5 | -83.4  | 77.4  | 3.6  |
| Ala-Ala-029 | B3LYP/6-311++G(d,p) | 73.6 | -60.2 | 70.7   | 23.3  | --   |
|             | ABEEM               | 78.6 | -61.2 | 71.6   | 18.4  | 3.0  |
|             | OPLS/AA             | --   | --    | --     | --    | --   |
|             | AMBER99sb           | --   | --    | --     | --    | --   |
|             | CHARMM27            | --   | --    | --     | --    | --   |
|             | AMOEBA              | 70.5 | -50.2 | 69.7   | 30.0  | 5.2  |
| Ala-Ala-030 | B3LYP/6-311++G(d,p) | 73.6 | -55.6 | 72.9   | -51.8 | --   |
|             | ABEEM               | 78.4 | -61.4 | 77.8   | -53.3 | 4.2  |
|             | OPLS/AA             | 68.4 | -58.6 | 66.3   | -54.7 | 4.4  |
|             | AMBER99sb           | 60.7 | -52.1 | 59.5   | -39.2 | 10.6 |
|             | CHARMM27            | 68.9 | -69.6 | 67.9   | -66.8 | 9.7  |
|             | AMOEBA              | 70.5 | -45.2 | 75.8   | -53.1 | 4.4  |

Geometry information of all Ala-tripeptides after classified are list in Table S8, with the same benchmark, the deviation values of the missed conformation contribute none to them, and only the conformations successfully obtained take part in the compare. The deviation of holistic conformations before classified are listed in the manuscript.

Table S9 The number, value( $^{\circ}$ ) and mean absolute deviation (MAD/ $^{\circ}$ ) of dihedral angles at backbone of the Gly-tripeptide's stable conformations by B3LYP/6-311++G(d,p), OPLS/AA, AMBER99sb, CHARMM27, AMOEBA, and ABEEM methods

| Tripeptide  | Method              | $\varphi_1$ | $\psi_1$ | $\varphi_2$ | $\psi_2$ | MAD |
|-------------|---------------------|-------------|----------|-------------|----------|-----|
| Gly-Gly-001 | B3LYP/6-311++G(d,p) | -179.9      | 179.8    | 179.8       | 179.4    | --  |
|             | ABEEM               | -179.8      | 180.0    | 179.2       | 178.6    | 0.4 |
|             | OPLS/AA             | -179.4      | 179.7    | 179.1       | -179.8   | 0.5 |
|             | AMBER99sb           | -179.8      | 179.7    | 179.7       | -179.8   | 0.3 |
|             | CHARMM27            | -179.8      | 179.6    | 179.4       | -179.4   | 1.2 |
|             | AMOEBA              | -171.1      | -179.6   | -167.1      | -178.1   | 6.3 |
| Gly-Gly-002 | B3LYP/6-311++G(d,p) | 173.2       | -174.2   | -112.3      | 14.8     | --  |
|             | ABEEM               | 172.4       | -175.7   | -111.3      | 18.6     | 1.8 |
|             | OPLS/AA             | --          | --       | --          | --       | --  |
|             | AMBER99sb           | --          | --       | --          | --       | --  |
|             | CHARMM27            | --          | --       | --          | --       | --  |
|             | AMOEBA              | 163.4       | -175.6   | -106.2      | 8.3      | 5.9 |
| Gly-Gly-003 | B3LYP/6-311++G(d,p) | 174.7       | -175.2   | -83.7       | 71.7     | --  |
|             | ABEEM               | 174.7       | -174.4   | -84.7       | 71.6     | 0.5 |
|             | OPLS/AA             | 179.4       | 178.0    | -80.6       | 66.6     | 4.9 |
|             | AMBER99sb           | -179.6      | 177.4    | -74.9       | 56.1     | 9.4 |
|             | CHARMM27            | -179.5      | 178.2    | -83.8       | 69.6     | 3.6 |
|             | AMOEBA              | 164.4       | 178.7    | -81.9       | 78.9     | 6.3 |
| Gly-Gly-004 | B3LYP/6-311++G(d,p) | -174.7      | 175.3    | 83.7        | -71.7    | --  |
|             | ABEEM               | -174.7      | 174.5    | 84.7        | -71.6    | 0.5 |
|             | OPLS/AA             | -179.3      | -178.1   | 80.7        | -66.6    | 4.8 |
|             | AMBER99sb           | 179.7       | -177.3   | 74.9        | -56.1    | 9.4 |
|             | CHARMM27            | 179.7       | -178.5   | 83.8        | -69.5    | 3.5 |
|             | AMOEBA              | -164.5      | -178.7   | 82.0        | -78.7    | 6.3 |
| Gly-Gly-005 | B3LYP/6-311++G(d,p) | -173.2      | 174.1    | 112.3       | -14.8    | --  |
|             | ABEEM               | -172.4      | 175.7    | 111.3       | -18.6    | 1.8 |
|             | OPLS/AA             | --          | --       | --          | --       | --  |
|             | AMBER99sb           | --          | --       | --          | --       | --  |
|             | CHARMM27            | --          | --       | --          | --       | --  |
|             | AMOEBA              | -163.2      | 175.3    | 106.8       | -9.1     | 5.6 |
| Gly-Gly-006 | B3LYP/6-311++G(d,p) | -109.8      | 11.6     | 172.1       | -178.8   | --  |

|             |                     |        |       |        |       |      |
|-------------|---------------------|--------|-------|--------|-------|------|
|             | ABEEM               | -115.0 | 24.6  | 156.9  | 171.8 | 10.6 |
|             | OPLS/AA             | --     | --    | --     | --    | --   |
|             | AMBER99sb           | --     | --    | --     | --    | --   |
|             | CHARMM27            | --     | --    | --     | --    | --   |
|             | AMOEBA              | -117.3 | 12.2  | 153.0  | 172.2 | 9.0  |
|             | B3LYP/6-311++G(d,p) | -74.2  | -11.4 | -100.0 | 10.0  | --   |
| Gly-Gly-007 | ABEEM               | -82.9  | 0.9   | -110.4 | 14.5  | 9.0  |
|             | OPLS/AA             | --     | --    | --     | --    | --   |
|             | AMBER99sb           | -62.3  | -11.1 | -81.0  | -1.9  | 10.8 |
|             | CHARMM27            | --     | --    | --     | --    | --   |
|             | AMOEBA              | -69.0  | -12.8 | -98.5  | 3.1   | 3.7  |
|             | B3LYP/6-311++G(d,p) | -115.1 | 12.7  | -82.1  | 67.8  | --   |
| Gly-Gly-008 | ABEEM               | -121.4 | 38.9  | -106.9 | 69.0  | 14.6 |
|             | OPLS/AA             | --     | --    | --     | --    | --   |
|             | AMBER99sb           | --     | --    | --     | --    | --   |
|             | CHARMM27            | --     | --    | --     | --    | --   |
|             | AMOEBA              | -113.0 | 7.0   | -83.6  | 76.7  | 4.5  |
|             | B3LYP/6-311++G(d,p) | -113.8 | 16.5  | 83.1   | -70.6 | --   |
| Gly-Gly-009 | ABEEM               | -111.9 | -5.2  | 108.6  | -73.6 | 13.0 |
|             | OPLS/AA             | --     | --    | --     | --    | --   |
|             | AMBER99sb           | --     | --    | --     | --    | --   |
|             | CHARMM27            | --     | --    | --     | --    | --   |
|             | AMOEBA              | -115.6 | 13.6  | 80.6   | -82.6 | 4.8  |
|             | B3LYP/6-311++G(d,p) | -108.6 | 13.1  | 114.7  | -16.9 | --   |
| Gly-Gly-010 | ABEEM               | -106.8 | 16.4  | 113.4  | -20.5 | 2.5  |
|             | OPLS/AA             | --     | --    | --     | --    | --   |
|             | AMBER99sb           | --     | --    | --     | --    | --   |
|             | CHARMM27            | --     | --    | --     | --    | --   |
|             | AMOEBA              | -99.3  | 4.4   | 105.8  | -14.5 | 7.3  |
|             | B3LYP/6-311++G(d,p) | -86.3  | 77.7  | -161.1 | 166.7 | --   |
| Gly-Gly-011 | ABEEM               | -118.2 | 49.2  | -126.5 | 179.2 | 26.9 |
|             | OPLS/AA             | --     | --    | --     | --    | --   |
|             | AMBER99sb           | --     | --    | --     | --    | --   |
|             | CHARMM27            | -89.9  | 65.5  | 174.9  | 176.0 | 12.3 |
|             | AMOEBA              | --     | --    | --     | --    | --   |
|             | B3LYP/6-311++G(d,p) | -82.5  | 71.0  | -112.3 | 10.1  | --   |
| Gly-Gly-012 | ABEEM               | -87.2  | 70.9  | -111.7 | 12.5  | 2.0  |
|             | OPLS/AA             | --     | --    | --     | --    | --   |
|             | AMBER99sb           | --     | --    | --     | --    | --   |
|             | CHARMM27            | --     | --    | --     | --    | --   |
|             | AMOEBA              | --     | --    | --     | --    | --   |
|             | B3LYP/6-311++G(d,p) | -82.0  | 65.9  | -82.6  | 66.5  | --   |
| Gly-Gly-013 | ABEEM               | -86.2  | 69.3  | -86.0  | 66.5  | 2.7  |
|             | OPLS/AA             | -80.9  | 67.5  | -78.0  | 64.0  | 2.4  |



|             |                     |        |       |        |        |      |
|-------------|---------------------|--------|-------|--------|--------|------|
|             | AMBER99sb           | -74.7  | 59.0  | -73.4  | 48.9   | 10.3 |
|             | CHARMM27            | -82.0  | 68.5  | -81.4  | 65.9   | 1.1  |
|             | AMOEBA              | -82.9  | 67.2  | -80.9  | 76.1   | 3.4  |
| Gly-Gly-014 | B3LYP/6-311++G(d,p) | -81.9  | 66.6  | 80.5   | -68.6  | --   |
|             | ABEEM               | -85.8  | 65.3  | 83.9   | -68.6  | 2.1  |
|             | OPLS/AA             | -80.4  | 66.0  | 76.4   | -68.2  | 1.6  |
|             | AMBER99sb           | -74.8  | 54.5  | 73.3   | -61.7  | 8.3  |
|             | CHARMM27            | -82.4  | 65.4  | 81.3   | -66.3  | 1.2  |
|             | AMOEBA              | -80.6  | 76.2  | 81.9   | -75.7  | 4.9  |
| Gly-Gly-015 | B3LYP/6-311++G(d,p) | -83.8  | 60.4  | 106.8  | -10.1  | --   |
|             | ABEEM               | -110.1 | 56.8  | 117.4  | -17.4  | 12.0 |
|             | OPLS/AA             | --     | --    | --     | --     | --   |
|             | AMBER99sb           | --     | --    | --     | --     | --   |
|             | CHARMM27            | --     | --    | --     | --     | --   |
|             | AMOEBA              | -64.3  | 119.1 | 97.4   | -1.4   | 24.0 |
| Gly-Gly-016 | B3LYP/6-311++G(d,p) | 87.3   | -72.5 | 171.8  | -170.1 | --   |
|             | ABEEM               | 109.7  | -59.6 | 155.1  | -177.0 | 14.7 |
|             | OPLS/AA             | --     | --    | --     | --     | --   |
|             | AMBER99sb           | --     | --    | --     | --     | --   |
|             | CHARMM27            | 89.5   | -68.8 | -177.7 | -178.1 | 6.1  |
|             | AMOEBA              | --     | --    | --     | --     | --   |
| Gly-Gly-017 | B3LYP/6-311++G(d,p) | 83.8   | -60.4 | -106.8 | 10.1   | --   |
|             | ABEEM               | 110.1  | -56.8 | -117.4 | 17.4   | 12.0 |
|             | OPLS/AA             | --     | --    | --     | --     | --   |
|             | AMBER99sb           | --     | --    | --     | --     | --   |
|             | CHARMM27            | --     | --    | --     | --     | --   |
|             | AMOEBA              | --     | --    | --     | --     | --   |
| Gly-Gly-018 | B3LYP/6-311++G(d,p) | 81.9   | -66.6 | -80.5  | 68.6   | --   |
|             | ABEEM               | 85.8   | -65.3 | -83.9  | 68.6   | 2.1  |
|             | OPLS/AA             | 80.5   | -66.1 | -76.5  | 68.3   | 1.6  |
|             | AMBER99sb           | 74.8   | -54.5 | -73.3  | 62.1   | 8.2  |
|             | CHARMM27            | 82.4   | -65.3 | -81.3  | 66.4   | 1.2  |
|             | AMOEBA              | 80.6   | -76.2 | -81.9  | 75.7   | 4.9  |
| Gly-Gly-019 | B3LYP/6-311++G(d,p) | 82.0   | -65.9 | 82.6   | -66.5  | --   |
|             | ABEEM               | 86.2   | -69.3 | 86.0   | -66.5  | 2.7  |
|             | OPLS/AA             | 80.9   | -67.5 | 77.9   | -64.1  | 2.4  |
|             | AMBER99sb           | 74.6   | -58.8 | 73.4   | -49.1  | 10.3 |
|             | CHARMM27            | 82.0   | -68.5 | 81.5   | -65.9  | 1.1  |
|             | AMOEBA              | 82.9   | -67.3 | 80.9   | -76.1  | 3.4  |
| Gly-Gly-020 | B3LYP/6-311++G(d,p) | 82.5   | -71.0 | 112.3  | -10.1  | --   |
|             | ABEEM               | 87.2   | -70.9 | 111.7  | -12.5  | 2.0  |
|             | OPLS/AA             | --     | --    | --     | --     | --   |
|             | AMBER99sb           | --     | --    | --     | --     | --   |
|             | CHARMM27            | --     | --    | --     | --     | --   |

|             |                     |       |       |        |        |      |
|-------------|---------------------|-------|-------|--------|--------|------|
|             | AMOEBA              | 80.7  | -67.4 | 137.5  | -6.3   | 8.6  |
| Gly-Gly-021 | B3LYP/6-311++G(d,p) | 109.5 | -11.4 | -172.2 | 178.0  | --   |
|             | ABEEM               | 115.4 | -25.3 | -157.6 | -176.3 | 10.0 |
|             | OPLS/AA             | --    | --    | --     | --     | --   |
|             | AMBER99sb           | --    | --    | --     | --     | --   |
|             | CHARMM27            | --    | --    | --     | --     | --   |
|             | AMOEBA              | 117.4 | -12.2 | -152.6 | -172.2 | 9.5  |
| Gly-Gly-022 | B3LYP/6-311++G(d,p) | 108.6 | -13.1 | -114.7 | 16.9   | --   |
|             | ABEEM               | 106.8 | -16.4 | -113.4 | 20.5   | 2.5  |
|             | OPLS/AA             | --    | --    | --     | --     | --   |
|             | AMBER99sb           | --    | --    | --     | --     | --   |
|             | CHARMM27            | --    | --    | --     | --     | --   |
|             | AMOEBA              | 98.9  | -4.1  | -106.1 | 14.5   | 7.4  |
| Gly-Gly-023 | B3LYP/6-311++G(d,p) | 113.9 | -16.5 | -83.1  | 70.6   | --   |
|             | ABEEM               | 111.7 | 4.9   | -108.2 | 73.7   | 12.9 |
|             | OPLS/AA             | --    | --    | --     | --     | --   |
|             | AMBER99sb           | --    | --    | --     | --     | --   |
|             | CHARMM27            | --    | --    | --     | --     | --   |
|             | AMOEBA              | 115.3 | -13.3 | -80.6  | 82.7   | 4.8  |
| Gly-Gly-024 | B3LYP/6-311++G(d,p) | 115.1 | -12.7 | 82.1   | -67.8  | --   |
|             | ABEEM               | 121.5 | -38.7 | 106.5  | -69.3  | 14.6 |
|             | OPLS/AA             | --    | --    | --     | --     | --   |
|             | AMBER99sb           | --    | --    | --     | --     | --   |
|             | CHARMM27            | --    | --    | --     | --     | --   |
|             | AMOEBA              | 112.5 | -6.7  | 83.7   | -76.6  | 4.7  |
| Gly-Gly-025 | B3LYP/6-311++G(d,p) | 74.1  | 11.4  | 100.0  | -10.0  | --   |
|             | ABEEM               | 82.9  | -0.9  | 110.4  | -14.5  | 9.0  |
|             | OPLS/AA             | --    | --    | --     | --     | --   |
|             | AMBER99sb           | 62.3  | 11.1  | 81.0   | 1.9    | 10.8 |
|             | CHARMM27            | --    | --    | --     | --     | --   |
|             | AMOEBA              | 69.0  | 13.0  | 98.5   | -3.3   | 3.7  |

*Ab initio* method obtains 25 Gly-tripeptide stable structures, and ABEEM, OPLS/AA, AMBER99sb, CHARMM27 and AMOEBA obtain 25, 7, 9, 9 and 21 stable structures, respectively. And the MAD values from each force field are 7.3°, 2.6°, 8.6°, 3.5° and 6.6°. But if considering all 25 structures, the MAD values increase obviously except ABEEM. And the values are 7.3°, 21.8°, 23.5°, 19.0° and 9.0°. This increase demonstrates the missing of stable conformations, and the torsions show the preference of each method.

Table S10 The number, value( $^{\circ}$ ) and mean absolute deviation (MAD/ $^{\circ}$ ) of dihedral angles at backbone of the Val-tripeptide's stable conformations by B3LYP/6-311++G(d,p), OPLS/AA, AMBER99sb, CHARMM27, AMOEBA, and ABEEM methods

| Tripeptide  | Method              | $\varphi_1$ | $\psi_1$ | $\varphi_2$ | $\psi_2$ | MAD  |
|-------------|---------------------|-------------|----------|-------------|----------|------|
| Val-Val-001 | B3LYP/6-311++G(d,p) | -156.8      | -51.1    | -155.2      | -48.7    | --   |
|             | ABEEM               | -154.2      | -51.6    | -158.4      | -45.1    | 2.5  |
|             | OPLS/AA             | --          | --       | --          | --       | --   |
|             | AMBER99sb           | -152.6      | -49.7    | -155.5      | -42.8    | 3.0  |
|             | CHARMM27            | -152.3      | -64.4    | -148.8      | -68.9    | 11.1 |
|             | AMOEBA              | -163.5      | -39.5    | -153.4      | -41.7    | 6.8  |
| Val-Val-002 | B3LYP/6-311++G(d,p) | -153.3      | -45.8    | -146.7      | 156.4    | --   |
|             | ABEEM               | -156.1      | -43.0    | -150.4      | 151.2    | 3.6  |
|             | OPLS/AA             | --          | --       | --          | --       | --   |
|             | AMBER99sb           | -147.1      | -28.9    | -144.7      | 154.1    | 6.9  |
|             | CHARMM27            | --          | --       | --          | --       | --   |
|             | AMOEBA              | --          | --       | --          | --       | --   |
| Val-Val-003 | B3LYP/6-311++G(d,p) | -153.4      | -39.0    | -107.1      | 6.2      | --   |
|             | ABEEM               | -152.6      | -48.1    | -97.1       | 11.4     | 6.3  |
|             | OPLS/AA             | --          | --       | --          | --       | --   |
|             | AMBER99sb           | --          | --       | --          | --       | --   |
|             | CHARMM27            | --          | --       | --          | --       | --   |
|             | AMOEBA              | --          | --       | --          | --       | --   |
| Val-Val-004 | B3LYP/6-311++G(d,p) | -155.8      | -49.1    | -85.0       | 80.3     | --   |
|             | ABEEM               | -156.5      | -50.8    | -82.8       | 79.6     | 1.4  |
|             | OPLS/AA             | --          | --       | --          | --       | --   |
|             | AMBER99sb           | --          | --       | --          | --       | --   |
|             | CHARMM27            | --          | --       | --          | --       | --   |
|             | AMOEBA              | -155.8      | -44.5    | -80.2       | 76.9     | 3.2  |
| Val-Val-005 | B3LYP/6-311++G(d,p) | -155.4      | -47.7    | 63.0        | -41.0    | --   |
|             | ABEEM               | -155.3      | -58.5    | 78.2        | -48.8    | 8.5  |
|             | OPLS/AA             | -150.5      | -60.3    | 55.4        | -49.2    | 8.3  |
|             | AMBER99sb           | -149.7      | -37.6    | 55.0        | -41.2    | 6.0  |
|             | CHARMM27            | --          | --       | --          | --       | --   |
|             | AMOEBA              | -163.7      | -37.1    | 68.4        | -39.7    | 6.4  |
| Val-Val-006 | B3LYP/6-311++G(d,p) | -147.8      | 151.9    | -157.0      | -45.2    | --   |
|             | ABEEM               | -152.5      | 145.4    | -154.4      | -45.7    | 3.6  |
|             | OPLS/AA             | -145.6      | 162.3    | -148.7      | -56.9    | 8.2  |
|             | AMBER99sb           | --          | --       | --          | --       | --   |
|             | CHARMM27            | --          | --       | --          | --       | --   |
|             | AMOEBA              | -145.1      | 157.8    | -161.1      | -36.7    | 5.3  |
| Val-Val-007 | B3LYP/6-311++G(d,p) | -150.6      | 158.6    | -112.6      | 3.9      | --   |
|             | ABEEM               | -151.4      | 134.6    | -85.5       | 7.4      | 13.8 |
|             | OPLS/AA             | --          | --       | --          | --       | --   |

|             |                     |        |       |        |       |      |
|-------------|---------------------|--------|-------|--------|-------|------|
|             | AMBER99sb           | --     | --    | --     | --    | --   |
|             | CHARMM27            | -145.8 | 157.4 | -75.4  | -28.6 | 18.9 |
|             | AMOEBA              | -147.7 | 160.0 | -80.1  | -18.9 | 14.9 |
| Val-Val-008 | B3LYP/6-311++G(d,p) | -149.4 | 152.2 | -85.0  | 77.4  | --   |
|             | ABEEM               | -149.4 | 149.1 | -82.8  | 77.4  | 1.3  |
|             | OPLS/AA             | -146.4 | 159.7 | -78.6  | 72.5  | 5.5  |
|             | AMBER99sb           | -147.8 | 152.5 | -77.8  | 63.1  | 5.9  |
|             | CHARMM27            | --     | --    | --     | --    | --   |
|             | AMOEBA              | -145.6 | 160.0 | -81.8  | 74.4  | 4.5  |
| Val-Val-009 | B3LYP/6-311++G(d,p) | -149.2 | 152.9 | 54.1   | 36.4  | --   |
|             | ABEEM               | -153.2 | 138.1 | 76.0   | 17.0  | 15.0 |
|             | OPLS/AA             | --     | --    | --     | --    | --   |
|             | AMBER99sb           | --     | --    | --     | --    | --   |
|             | CHARMM27            | --     | --    | --     | --    | --   |
|             | AMOEBA              | --     | --    | --     | --    | --   |
| Val-Val-010 | B3LYP/6-311++G(d,p) | -149.6 | 153.0 | 64.9   | -39.3 | --   |
|             | ABEEM               | -152.7 | 142.1 | 79.8   | -47.1 | 9.2  |
|             | OPLS/AA             | -144.4 | 160.1 | 55.5   | -49.7 | 8.0  |
|             | AMBER99sb           | -147.2 | 151.6 | 55.4   | -40.0 | 3.5  |
|             | CHARMM27            | -140.4 | 150.6 | 59.6   | -57.0 | 8.7  |
|             | AMOEBA              | -140.0 | 159.1 | 66.0   | -39.4 | 4.2  |
| Val-Val-011 | B3LYP/6-311++G(d,p) | -118.3 | 6.7   | -155.5 | -40.1 | --   |
|             | ABEEM               | -113.1 | 11.3  | -159.3 | -47.1 | 5.1  |
|             | OPLS/AA             | --     | --    | --     | --    | --   |
|             | AMBER99sb           | --     | --    | --     | --    | --   |
|             | CHARMM27            | --     | --    | --     | --    | --   |
|             | AMOEBA              | -80.4  | -15.7 | -162.1 | -35.7 | 17.8 |
| Val-Val-012 | B3LYP/6-311++G(d,p) | -74.2  | -13.5 | -95.0  | 1.3   | --   |
|             | ABEEM               | -70.2  | -14.2 | -94.2  | 4.9   | 2.3  |
|             | OPLS/AA             | --     | --    | --     | --    | --   |
|             | AMBER99sb           | -60.5  | -18.3 | -75.6  | -9.4  | 12.1 |
|             | CHARMM27            | -62.0  | -21.8 | -75.2  | -18.4 | 15.0 |
|             | AMOEBA              | -73.5  | -12.1 | -80.6  | -11.8 | 7.4  |
| Val-Val-013 | B3LYP/6-311++G(d,p) | -107.3 | -4.3  | -85.1  | 74.7  | --   |
|             | ABEEM               | -103.0 | -1.1  | -84.9  | 74.7  | 1.9  |
|             | OPLS/AA             | -62.1  | -41.0 | -81.0  | 72.4  | 22.0 |
|             | AMBER99sb           | --     | --    | --     | --    | --   |
|             | CHARMM27            | --     | --    | --     | --    | --   |
|             | AMOEBA              | --     | --    | --     | --    | --   |
| Val-Val-014 | B3LYP/6-311++G(d,p) | -102.0 | -2.4  | 63.8   | -41.4 | --   |
|             | ABEEM               | -91.4  | -10.3 | 80.4   | -50.4 | 11.0 |
|             | OPLS/AA             | --     | --    | --     | --    | --   |
|             | AMBER99sb           | --     | --    | --     | --    | --   |
|             | CHARMM27            | -74.5  | -28.6 | 57.3   | -58.9 | 19.4 |

|             |                     |        |       |        |       |      |
|-------------|---------------------|--------|-------|--------|-------|------|
|             | AMOEBA              | -79.2  | -19.5 | 68.0   | -41.3 | 11.0 |
| Val-Val-015 | B3LYP/6-311++G(d,p) | -82.5  | 69.4  | -159.5 | -33.3 | --   |
|             | ABEEM               | -82.3  | 70.8  | -159.7 | -34.5 | 0.7  |
|             | OPLS/AA             | -74.6  | 73.5  | -155.9 | -43.8 | 6.5  |
|             | AMBER99sb           | -75.8  | 56.5  | -148.8 | -21.0 | 10.7 |
|             | CHARMM27            | -77.6  | 72.1  | -149.8 | -44.5 | 7.1  |
|             | AMOEBA              | -77.0  | 65.4  | -163.9 | -31.4 | 3.9  |
| Val-Val-016 | B3LYP/6-311++G(d,p) | -150.8 | 155.2 | -151.9 | 153.5 | --   |
|             | ABEEM               | -152.3 | 152.3 | -150.6 | 148.9 | 2.6  |
|             | OPLS/AA             | -147.2 | 161.5 | -142.1 | 157.9 | 6.0  |
|             | AMBER99sb           | -148.2 | 153.5 | -145.8 | 151.1 | 3.2  |
|             | CHARMM27            | -141.9 | 153.3 | -135.4 | 151.3 | 7.4  |
|             | AMOEBA              | --     | --    | --     | --    | --   |
| Val-Val-017 | B3LYP/6-311++G(d,p) | -85.7  | 74.5  | -114.4 | -1.2  | --   |
|             | ABEEM               | -84.6  | 72.7  | -110.5 | 2.7   | 2.7  |
|             | OPLS/AA             | -78.9  | 71.5  | -71.6  | -27.8 | 19.8 |
|             | AMBER99sb           | --     | --    | --     | --    | --   |
|             | CHARMM27            | -80.5  | 70.1  | -85.2  | -32.2 | 17.4 |
|             | AMOEBA              | -79.0  | 66.5  | -129.2 | 0.8   | 7.9  |
| Val-Val-018 | B3LYP/6-311++G(d,p) | -85.9  | 71.5  | -86.9  | 74.6  | --   |
|             | ABEEM               | -81.7  | 70.2  | -80.6  | 73.9  | 3.2  |
|             | OPLS/AA             | -79.4  | 74.9  | -77.4  | 68.4  | 6.4  |
|             | AMBER99sb           | -78.3  | 67.1  | -78.5  | 55.4  | 9.9  |
|             | CHARMM27            | --     | --    | --     | --    | --   |
|             | AMOEBA              | -80.3  | 53.6  | -85.0  | 72.6  | 6.9  |
| Val-Val-019 | B3LYP/6-311++G(d,p) | -86.7  | 69.2  | 48.3   | 41.5  | --   |
|             | ABEEM               | -84.0  | 68.7  | 51.8   | 34.3  | 3.5  |
|             | OPLS/AA             | --     | --    | --     | --    | --   |
|             | AMBER99sb           | --     | --    | --     | --    | --   |
|             | CHARMM27            | --     | --    | --     | --    | --   |
|             | AMOEBA              | --     | --    | --     | --    | --   |
| Val-Val-020 | B3LYP/6-311++G(d,p) | -85.3  | 73.1  | 59.5   | -41.0 | --   |
|             | ABEEM               | -83.8  | 66.4  | 74.5   | -48.5 | 7.7  |
|             | OPLS/AA             | -79.0  | 73.2  | 55.3   | -51.2 | 5.2  |
|             | AMBER99sb           | -79.6  | 64.4  | 54.8   | -42.5 | 5.2  |
|             | CHARMM27            | -81.7  | 75.1  | 59.4   | -55.8 | 5.2  |
|             | AMOEBA              | -79.3  | 77.5  | 70.6   | -36.9 | 6.4  |
| Val-Val-021 | B3LYP/6-311++G(d,p) | 55.1   | 32.8  | -157.8 | 154.7 | --   |
|             | ABEEM               | 72.5   | 22.0  | -154.7 | 146.7 | 9.8  |
|             | OPLS/AA             | 38.9   | 51.6  | -147.1 | 157.0 | 12.0 |
|             | AMBER99sb           | --     | --    | --     | --    | --   |
|             | CHARMM27            | --     | --    | --     | --    | --   |
|             | AMOEBA              | --     | --    | --     | --    | --   |
| Val-Val-022 | B3LYP/6-311++G(d,p) | 54.0   | 36.7  | -89.3  | 75.2  | --   |

|             |                     |      |       |        |       |      |
|-------------|---------------------|------|-------|--------|-------|------|
|             | ABEEM               | 50.1 | 34.1  | -84.4  | 74.8  | 2.9  |
|             | OPLS/AA             | --   | --    | --     | --    | --   |
|             | AMBER99sb           | --   | --    | --     | --    | --   |
|             | CHARMM27            | --   | --    | --     | --    | --   |
|             | AMOEBA              | 57.7 | 32.3  | -85.0  | 75.2  | 3.1  |
|             | B3LYP/6-311++G(d,p) | 48.1 | 42.8  | 46.5   | 37.6  | --   |
| Val-Val-023 | ABEEM               | 61.4 | 27.0  | 65.6   | 25.4  | 15.1 |
|             | OPLS/AA             | --   | --    | --     | --    | --   |
|             | AMBER99sb           | 46.9 | 32.5  | 52.1   | 17.0  | 9.4  |
|             | CHARMM27            | --   | --    | --     | --    | --   |
|             | AMOEBA              | 52.4 | 31.9  | 56.6   | 25.0  | 9.5  |
|             | B3LYP/6-311++G(d,p) | 53.0 | 42.6  | 63.6   | -40.1 | --   |
| Val-Val-024 | ABEEM               | 78.1 | 11.1  | 88.9   | -24.3 | 24.4 |
|             | OPLS/AA             | --   | --    | --     | --    | --   |
|             | AMBER99sb           | --   | --    | --     | --    | --   |
|             | CHARMM27            | --   | --    | --     | --    | --   |
|             | AMOEBA              | --   | --    | --     | --    | --   |
|             | B3LYP/6-311++G(d,p) | 56.4 | -61.1 | -117.5 | -13.5 | --   |
| Val-Val-025 | ABEEM               | 69.5 | -65.3 | -117.7 | -12.6 | 4.6  |
|             | OPLS/AA             | 41.6 | -92.9 | -75.2  | -24.6 | 25.1 |
|             | AMBER99sb           | 51.8 | -52.3 | -138.3 | -14.7 | 8.9  |
|             | CHARMM27            | 52.1 | -71.5 | -89.0  | -28.1 | 14.4 |
|             | AMOEBA              | 62.0 | -47.2 | -143.8 | -9.1  | 12.5 |
|             | B3LYP/6-311++G(d,p) | 64.3 | -45.0 | -84.2  | 75.6  | --   |
| Val-Val-026 | ABEEM               | 76.8 | -50.6 | -81.7  | 75.0  | 5.3  |
|             | OPLS/AA             | 56.9 | -55.0 | -79.3  | 73.8  | 6.0  |
|             | AMBER99sb           | 55.6 | -40.2 | -79.5  | 61.3  | 8.2  |
|             | CHARMM27            | 59.4 | -54.9 | -81.8  | 75.3  | 4.4  |
|             | AMOEBA              | 64.6 | -44.5 | -81.3  | 74.4  | 1.2  |
|             | B3LYP/6-311++G(d,p) | 65.7 | -36.7 | -95.3  | -8.5  | --   |
| Val-Val-027 | ABEEM               | 78.0 | -48.6 | -88.7  | -6.3  | 8.3  |
|             | OPLS/AA             | --   | --    | --     | --    | --   |
|             | AMBER99sb           | --   | --    | --     | --    | --   |
|             | CHARMM27            | --   | --    | --     | --    | --   |
|             | AMOEBA              | --   | --    | --     | --    | --   |
|             | B3LYP/6-311++G(d,p) | 63.5 | -46.6 | 50.6   | 42.9  | --   |
| Val-Val-028 | ABEEM               | 78.2 | -56.6 | 58.4   | 34.8  | 10.1 |
|             | OPLS/AA             | --   | --    | --     | --    | --   |
|             | AMBER99sb           | --   | --    | --     | --    | --   |
|             | CHARMM27            | --   | --    | --     | --    | --   |
|             | AMOEBA              | 67.7 | -27.1 | 64.4   | 30.6  | 12.5 |

*Ab initio* method obtains 28 Val-tripeptide stable structures, and ABEEM, OPLS/AA,

AMBER99sb, CHARMM27 and AMOEBA obtain 28, 13, 13, 11 and 19 stable structures, respectively. And the MAD values from each force field are 6.7°, 10.7°, 7.1°, 11.7° and 7.7°. But if considering all 28 structures, the MAD values increase obviously except ABEEM. And the values are 6.7°, 29.7°, 18.1°, 25.5° and 13.9°. These increases demonstrate the missing of stable conformations, and the torsions show the preference of each method.

Table S11 The MAD (°) of  $\chi_1$  at side chain of all Val conformations by force fields

|            |            | ABEEM | OPLS/AA | AMBER99sb | CHARMM27 | AMOEBA |
|------------|------------|-------|---------|-----------|----------|--------|
| Dipeptide  |            | 7.0   | 8.7     | 4.4       | 4.8      | 8.0    |
|            | N-terminal | 2.5   | 6.2     | 3.5       | 4.5      | 8.0    |
| Tripeptide | C-terminal | 2.8   | 6.6     | 4.4       | 5.4      | 8.5    |
|            | Total      | 2.6   | 6.4     | 3.9       | 5.0      | 8.3    |

Val contains one dihedral angle at side chain as  $\chi_1$  and  $\chi_1$  and backbone torsions limit each other in torsion rotation. Because of the distributions of  $\chi_1$  are concentrated in a narrow range, so all force fields reproduce it with deviation value less than 10°.

Table S12 The energy  $\Delta E$  values (kcal/mol) of all Ala conformations obtained by MP2/6-311++G(d,p), ABEEM, OPLS/AA, AMBER99sb, CHARMM27 and AMOEBA and RMSD values (kcal/mol) by each FF compared with those of MP2/6-311++G(d,p)

| Structure | MP2/6-311++G(d,p) | ABEEM  | OPLS/AA | AMBER99sb | CHARMM27 | AMOEBA |
|-----------|-------------------|--------|---------|-----------|----------|--------|
| Gly       | g01               | 0.0000 | 0.0000  | 1.7864    | 0.6944   | 0.2633 |
|           | g02               | 2.6703 | 2.6523  | 1.7864    | 0.6944   | 0.0001 |
|           | g03               | 2.6760 | 2.6556  | 1.7864    | 0.6944   | 0.0000 |
|           | g04               | 0.0000 | 0.0000  | 1.7864    | 0.6944   | 0.2632 |
|           | g05               | 2.1592 | 2.1387  | 0.0000    | 0.0000   | 0.9376 |
|           | RMSD              | --     | 0.0152  | 1.5885    | 1.6406   | 1.7845 |
| Val       | v01               | 4.1589 | 4.8537  | 5.4141    | 4.0159   | 3.9461 |
|           | v02               | 2.9508 | 4.6465  | 1.9105    | 3.2877   | 3.0938 |
|           | v03               | 4.8726 | 5.9602  | 8.2644    | 3.2877   | 4.7530 |
|           | v04               | 6.3364 | 6.4039  | 1.9105    | 4.0158   | 3.9461 |
|           | v05               | 0.5799 | 0.8088  | 1.9104    | 3.2878   | 0.8684 |
|           | v06               | 0.0000 | 0.0000  | 0.0000    | 0.0000   | 0.0000 |
|           | RMSD              | --     | 0.8754  | 2.4331    | 1.6002   | 0.9897 |

Table S13 The energy  $\Delta E$  (kcal/mol) of Ala stable conformations obtained by MP2/6-311++G(d,p), ABEEM, OPLS/AA, AMBER99sb, CHARMM27, and AMOEBA

| Structure | $\Delta E$        |        |         |           |          |        |        |
|-----------|-------------------|--------|---------|-----------|----------|--------|--------|
|           | MP2/6-311++G(d,p) | ABEEM  | OPLS/AA | AMBER99sb | CHARMM27 | AMOEBA |        |
| Ala       | a01               | 2.1994 | 2.0834  | 3.3527    | 2.9429   | 2.0539 | 2.4737 |
|           | a02               | 6.0117 | 5.6330  | --        | 9.2027   | --     | 5.5573 |
|           | a03               | 3.0867 | 2.8260  | --        | --       | --     | 2.7775 |
|           | a04               | 0.0000 | 0.0000  | 0.6968    | 1.6274   | 0.0000 | 0.0000 |
|           | a05               | 4.5334 | 4.3949  | 9.2528    | --       | --     | 4.4133 |
|           | a06               | 1.6670 | 1.9619  | 0.0000    | 0.0000   | 0.9164 | 1.1977 |
| Gly       | g01               | 0.0000 | 0.0000  | 1.7864    | 0.6944   | 0.2633 | 0.0001 |
|           | g02               | 2.6703 | 2.6523  | --        | --       | 0.0001 | 2.1626 |
|           | g03               | 2.6760 | 2.6556  | --        | --       | 0.0000 | 2.1626 |
|           | g04               | 0.0000 | 0.0000  | 1.7864    | 0.6944   | 0.2632 | 0.0000 |
|           | g05               | 2.1592 | 2.1387  | 0.0000    | 0.0000   | 0.9376 | 1.1400 |
| Val       | v01               | 4.1589 | 4.8537  | 5.4141    | 4.0159   | 3.9461 | 3.6558 |
|           | v02               | 2.9508 | 4.6465  | --        | --       | --     | --     |
|           | v03               | 4.8726 | 5.9602  | 8.2644    | --       | 4.7530 | 6.1293 |
|           | v04               | 6.3364 | 6.4039  | --        | --       | --     | 6.3855 |
|           | v05               | 0.5799 | 0.8088  | 1.9104    | 3.2878   | 0.8684 | 0.0000 |
|           | v06               | 0.0000 | 0.0000  | 0.0000    | 0.0000   | 0.0000 | 1.7678 |

Table S14 The backbone distribution of Gly-dipeptide and tripeptide in Ramachandran map from B3LYP/6-311++G(d,p) and each force field after and before classified (after classified / before classified)

|                | B3LYP/6-311++G(d,p) |     | ABEEM |     | OPLS/AA |      | AMBER99sb |      | CHARMM27 |      | AMOEBA |       |
|----------------|---------------------|-----|-------|-----|---------|------|-----------|------|----------|------|--------|-------|
|                | Di                  | Tri | Di    | Tri | Di      | Tri  | Di        | Tri  | Di       | Tri  | Di     | Tri   |
| $\beta_L-1$    | 0                   | 5   | 0     | 4   | 1/1     | 1/1  | 0/0       | 2/3  | 1/1      | 2/3  | 0/0    | 1/1   |
| $\beta_L-2$    | 1                   | 1   | 1     | 2   | 0/0     | 1/2  | 0/0       | 0/0  | 0/0      | 1/2  | 0/0    | 2/2   |
| $\beta_L-3$    | 0                   | 0   | 0     | 1   | 0/0     | 1/2  | 1/1       | 0/1  | 0/0      | 1/2  | 1/1    | 4/4   |
| $\beta_L-4$    | 0                   | 4   | 0     | 3   | 0/0     | 1/1  | 0/0       | 2/3  | 0/0      | 2/3  | 0/0    | 1/1   |
| $\epsilon_L-1$ | 0                   | 0   | 0     | 0   | 0/0     | 0/2  | 0/0       | 0/3  | 0/0      | 0/0  | 0/0    | 0/1   |
| $\epsilon_D-2$ | 0                   | 0   | 0     | 0   | 0/0     | 0/2  | 0/0       | 0/1  | 0/0      | 0/0  | 0/0    | 0/1   |
| $\delta_L-1$   | 0                   | 0   | 0     | 1   | 0/0     | 0/0  | 0/0       | 0/0  | 0/0      | 0/1  | 0/0    | 0/1   |
| $\delta_D-2$   | 0                   | 0   | 0     | 1   | 0/0     | 0/0  | 0/0       | 0/0  | 0/0      | 0/1  | 0/0    | 1/1   |
| $\gamma_L$     | 2                   | 19  | 2     | 18  | 1/2     | 5/19 | 1/2       | 5/17 | 1/2      | 6/19 | 2/2    | 15/18 |
| $\alpha_D$     | 0                   | 1   | 0     | 1   | 0/0     | 0/1  | 0/0       | 2/2  | 0/0      | 0/0  | 0/0    | 1/1   |
| $\alpha_L$     | 0                   | 1   | 0     | 1   | 0/0     | 0/1  | 0/0       | 2/2  | 0/0      | 0/0  | 0/0    | 1/1   |
| $\gamma_D$     | 2                   | 19  | 2     | 18  | 1/2     | 5/19 | 1/2       | 5/18 | 1/2      | 6/19 | 2/2    | 16/18 |

Table S15 The backbone distribution of Val-dipeptide and tripeptide in Ramachandran map from B3LYP/6-311++G(d,p) and each force field after and before



classified (after classified / before classified)

|                  | B3LYP/6-311++G(d,p) |     | ABEEM |     | OPLS/AA |      | AMBER99sb |      | CHARMM27 |      | AMOEBA |      |
|------------------|---------------------|-----|-------|-----|---------|------|-----------|------|----------|------|--------|------|
|                  | Di                  | Tri | Di    | Tri | Di      | Tri  | Di        | Tri  | Di       | Tri  | Di     | Tri  |
| $\beta_{L-1}$    | 1                   | 9   | 1     | 9   | 1/1     | 6/12 | 1/1       | 5/8  | 1/1      | 4/6  | 1/1    | 4/5  |
| $\epsilon_{L-1}$ | 0                   | 0   | 0     | 0   | 0/0     | 0/6  | 0/0       | 0/3  | 0/0      | 0/8  | 0/0    | 0/5  |
| $\delta_{L-1}$   | 0                   | 0   | 0     | 0   | 0/0     | 0/0  | 0/0       | 0/0  | 0/0      | 0/0  | 0/0    | 1/1  |
| $\delta_{D-1}$   | 1                   | 9   | 1     | 9   | 1/1     | 3/8  | 0/0       | 6/9  | 1/1      | 3/6  | 1/1    | 8/11 |
| $\gamma_L$       | 2                   | 15  | 2     | 16  | 1/3     | 8/13 | 1/3       | 6/15 | 1/1      | 4/7  | 1/1    | 9/11 |
| $\alpha_D$       | 1                   | 8   | 1     | 8   | 0/0     | 1/2  | 0/0       | 2/2  | 0/0      | 0/0  | 1/1    | 4/6  |
| $\alpha_L$       | 0                   | 6   | 0     | 5   | 0/0     | 3/6  | 0/0       | 2/4  | 0/1      | 6/13 | 0/1    | 5/6  |
| $\gamma_D$       | 1                   | 9   | 1     | 9   | 1/1     | 5/9  | 1/2       | 5/15 | 1/2      | 5/16 | 1/1    | 7/11 |

In Table S14 and S15, the distribution of Gly and Val-dipeptide and tripeptide are obvious, and the preference of different methods in various regions is depicted.

Table S16 The  ${}^3J(H_N, H_\alpha)$  (Hz) of the central residue of Ala tetrapeptide under different temperature (K)

| Temperaur<br>e | ABEEM |
|----------------|-------|
| 280            | 5.61  |
| 300            | 6.01  |
| 311            | 6.43  |
| 320            | 6.85  |
| 345            | 7.15  |
| 360            | 7.28  |

Table S17 The  $J$ -coupling constants (Hz) of residues in (Ala)<sub>4</sub> obtained by dynamic and NMR

| Residue | $J$ -coupling type     | ABEEM | Exp.  |
|---------|------------------------|-------|-------|
| Ala-2   | ${}^3J(H_N, H_\alpha)$ | 6.06  | 5.62  |
| Ala-2   | ${}^3J(H_N, C')$       | 1.02  | 1.15  |
| Ala-2   | ${}^3J(H_\alpha, C')$  | 1.59  | 1.87  |
| Ala-2   | ${}^3J(C', C')$        | 0.46  | 0.19  |
| Ala-2   | ${}^3J(H_N, C_\beta)$  | 2.26  | 2.36  |
| Ala-2   | ${}^1J(N, C_\alpha)$   | 10.78 | 11.39 |
| Ala-2   | ${}^2J(N, C_\alpha)$   | 8.17  | 9.17  |
| Ala-2   | ${}^3J(H_N, C_\alpha)$ | 0.67  | 0.68  |
| Ala-3   | ${}^3J(H_N, H_\alpha)$ | 6.16  | 5.89  |
| Ala-3   | ${}^3J(H_N, C')$       | 1.01  | 1.11  |
| Ala-3   | ${}^3J(H_\alpha, C')$  | 1.62  | 1.95  |
| Ala-3   | ${}^3J(H_N, C_\beta)$  | 2.25  | 2.24  |
| Ala-3   | ${}^2J(N, C_\alpha)$   | 8.52  | 8.56  |

|       |                                             |       |       |
|-------|---------------------------------------------|-------|-------|
| Ala-3 | ${}^3J(\text{H}_\text{N}, \text{C}_\alpha)$ | 0.67  | 0.60  |
| Ala-4 | ${}^3J(\text{H}_\text{N}, \text{H}_\alpha)$ | 7.40  | 6.56  |
| Ala-4 | ${}^3J(\text{H}_\text{N}, \text{C}_\beta)$  | 1.97  | 2.24  |
| Ala-4 | ${}^1J(\text{N}, \text{C}_\alpha)$          | 11.85 | 11.53 |
| Ala-4 | ${}^2J(\text{N}, \text{C}_\alpha)$          | 7.98  | 8.37  |
| Ala-4 | ${}^3J(\text{H}_\text{N}, \text{C}_\alpha)$ | 0.77  | 0.60  |
| MAD   | --                                          | 0.30  | --    |
| RMSD  | --                                          | 0.27  | --    |

Table S18 The  $J$ -coupling constants (Hz) of residues in (Ala)<sub>6</sub> obtained by dynamic and NMR

| Residue | $J$ -coupling type                          | ABEEM | Exp.  |
|---------|---------------------------------------------|-------|-------|
| Ala-2   | ${}^3J(\text{H}_\text{N}, \text{H}_\alpha)$ | 6.20  | 5.60  |
| Ala-2   | ${}^3J(\text{H}_\text{N}, \text{C}')$       | 1.00  | 1.13  |
| Ala-2   | ${}^3J(\text{H}_\alpha, \text{C}')$         | 1.63  | 1.81  |
| Ala-2   | ${}^3J(\text{H}_\text{N}, \text{C}_\beta)$  | 2.24  | 2.33  |
| Ala-2   | ${}^3J(\text{H}_\text{N}, \text{C}_\alpha)$ | 0.47  | 0.66  |
| Ala-3   | ${}^3J(\text{H}_\text{N}, \text{H}_\alpha)$ | 5.29  | 5.67  |
| Ala-3   | ${}^3J(\text{H}_\text{N}, \text{C}')$       | 1.19  | 1.20  |
| Ala-3   | ${}^3J(\text{H}_\alpha, \text{C}')$         | 1.40  | 1.79  |
| Ala-3   | ${}^3J(\text{H}_\text{N}, \text{C}_\beta)$  | 2.37  | 2.23  |
| Ala-3   | ${}^1J(\text{N}, \text{C}_\alpha)$          | 10.04 | 11.26 |
| Ala-3   | ${}^3J(\text{H}_\text{N}, \text{C}_\alpha)$ | 0.67  | 0.59  |
| Ala-4   | ${}^3J(\text{H}_\text{N}, \text{H}_\alpha)$ | 6.32  | 5.80  |
| Ala-4   | ${}^3J(\text{H}_\text{N}, \text{C}')$       | 0.98  | 1.22  |
| Ala-4   | ${}^3J(\text{H}_\alpha, \text{C}')$         | 1.66  | 1.73  |
| Ala-4   | ${}^3J(\text{H}_\text{N}, \text{C}_\beta)$  | 2.22  | 2.18  |
| Ala-4   | ${}^1J(\text{N}, \text{C}_\alpha)$          | 10.22 | 11.27 |
| Ala-4   | ${}^3J(\text{H}_\text{N}, \text{C}_\alpha)$ | 0.23  | 0.54  |
| Ala-5   | ${}^3J(\text{H}_\text{N}, \text{H}_\alpha)$ | 6.29  | 6.02  |
| Ala-5   | ${}^3J(\text{H}_\text{N}, \text{C}')$       | 0.98  | 1.05  |
| Ala-5   | ${}^3J(\text{H}_\alpha, \text{C}')$         | 1.65  | 1.99  |
| Ala-5   | ${}^3J(\text{H}_\text{N}, \text{C}_\beta)$  | 2.23  | 2.20  |
| Ala-5   | ${}^3J(\text{H}_\text{N}, \text{C}_\alpha)$ | 0.31  | 0.53  |
| Ala-6   | ${}^3J(\text{H}_\text{N}, \text{H}_\alpha)$ | 6.36  | 6.59  |
| Ala-6   | ${}^3J(\text{H}_\text{N}, \text{C}')$       | 0.98  | 1.29  |
| Ala-6   | ${}^3J(\text{H}_\text{N}, \text{C}_\beta)$  | 1.68  | 2.23  |
| Ala-6   | ${}^1J(\text{N}, \text{C}_\alpha)$          | 2.21  | 1.94  |
| Ala-6   | ${}^2J(\text{N}, \text{C}_\alpha)$          | 7.79  | 8.18  |
| Ala-6   | ${}^3J(\text{H}_\text{N}, \text{C}_\alpha)$ | 0.66  | 0.62  |
| MAD     | --                                          | 0.30  | --    |
| RMSD    | --                                          | 0.27  | --    |

Table S19 The  $J$ -coupling constants (Hz) of residues in (Ala)<sub>7</sub> obtained by dynamic and NMR

| Residue | $J$ -coupling type                        | ABEEM | Exp.  |
|---------|-------------------------------------------|-------|-------|
| Ala-2   | $^3J(\text{H}_\text{N}, \text{H}_\alpha)$ | 6.64  | 5.61  |
| Ala-2   | $^3J(\text{H}_\text{N}, \text{C}')$       | 0.94  | 1.15  |
| Ala-2   | $^3J(\text{H}_\alpha, \text{C}')$         | 1.75  | 1.89  |
| Ala-2   | $^3J(\text{H}_\text{N}, \text{C}_\beta)$  | 2.16  | 2.31  |
| Ala-2   | $^1J(\text{N}, \text{C}_\alpha)$          | 9.54  | 11.37 |
| Ala-2   | $^2J(\text{N}, \text{C}_\alpha)$          | 8.57  | 9.17  |
| Ala-2   | $^3J(\text{H}_\text{N}, \text{C}_\alpha)$ | 0.67  | 0.71  |
| Ala-3   | $^3J(\text{H}_\text{N}, \text{H}_\alpha)$ | 7.03  | 5.66  |
| Ala-3   | $^3J(\text{H}_\text{N}, \text{C}')$       | 0.90  | 1.20  |
| Ala-3   | $^3J(\text{H}_\alpha, \text{C}')$         | 1.86  | 1.85  |
| Ala-3   | $^3J(\text{H}_\text{N}, \text{C}_\beta)$  | 2.07  | 2.20  |
| Ala-3   | $^1J(\text{N}, \text{C}_\alpha)$          | 10.23 | 11.27 |
| Ala-3   | $^2J(\text{N}, \text{C}_\alpha)$          | 7.84  | 8.52  |
| Ala-3   | $^3J(\text{H}_\text{N}, \text{C}_\alpha)$ | 0.67  | 0.66  |
| Ala-4   | $^3J(\text{H}_\text{N}, \text{H}_\alpha)$ | 6.42  | 5.77  |
| Ala-4   | $^3J(\text{H}_\text{N}, \text{C}_\beta)$  | 2.20  | 2.23  |
| Ala-4   | $^1J(\text{N}, \text{C}_\alpha)$          | 11.61 | 11.22 |
| Ala-4   | $^2J(\text{N}, \text{C}_\alpha)$          | 8.35  | 8.29  |
| Ala-4   | $^3J(\text{H}_\text{N}, \text{C}_\alpha)$ | 0.68  | 0.56  |
| Ala-5   | $^3J(\text{H}_\text{N}, \text{H}_\alpha)$ | 6.46  | 5.92  |
| Ala-5   | $^3J(\text{H}_\text{N}, \text{C}')$       | 0.96  | 1.19  |
| Ala-5   | $^3J(\text{H}_\alpha, \text{C}')$         | 1.70  | 1.56  |
| Ala-5   | $^3J(\text{H}_\text{N}, \text{C}_\beta)$  | 2.19  | 2.23  |
| Ala-5   | $^1J(\text{N}, \text{C}_\alpha)$          | 11.07 | 11.29 |
| Ala-5   | $^2J(\text{N}, \text{C}_\alpha)$          | 8.67  | 8.22  |
| Ala-6   | $^3J(\text{H}_\text{N}, \text{C}')$       | 0.88  | 1.10  |
| Ala-6   | $^3J(\text{H}_\alpha, \text{C}')$         | 2.12  | 1.67  |
| Ala-6   | $^3J(\text{H}_\text{N}, \text{C}_\beta)$  | 1.84  | 2.21  |
| Ala-6   | $^2J(\text{N}, \text{C}_\alpha)$          | 8.60  | 8.24  |
| Ala-7   | $^3J(\text{H}_\text{N}, \text{H}_\alpha)$ | 6.78  | 6.60  |
| Ala-7   | $^3J(\text{H}_\text{N}, \text{C}')$       | 0.92  | 1.25  |
| Ala-7   | $^3J(\text{H}_\text{N}, \text{C}_\beta)$  | 1.79  | 2.03  |
| Ala-7   | $^1J(\text{N}, \text{C}_\alpha)$          | 2.13  | 1.99  |
| Ala-7   | $^2J(\text{N}, \text{C}_\alpha)$          | 10.56 | 11.51 |
| Ala-7   | $^3J(\text{H}_\text{N}, \text{C}_\alpha)$ | 0.48  | 0.59  |
| MAD     | --                                        | 0.39  | --    |
| RMSD    | --                                        | 0.41  | --    |

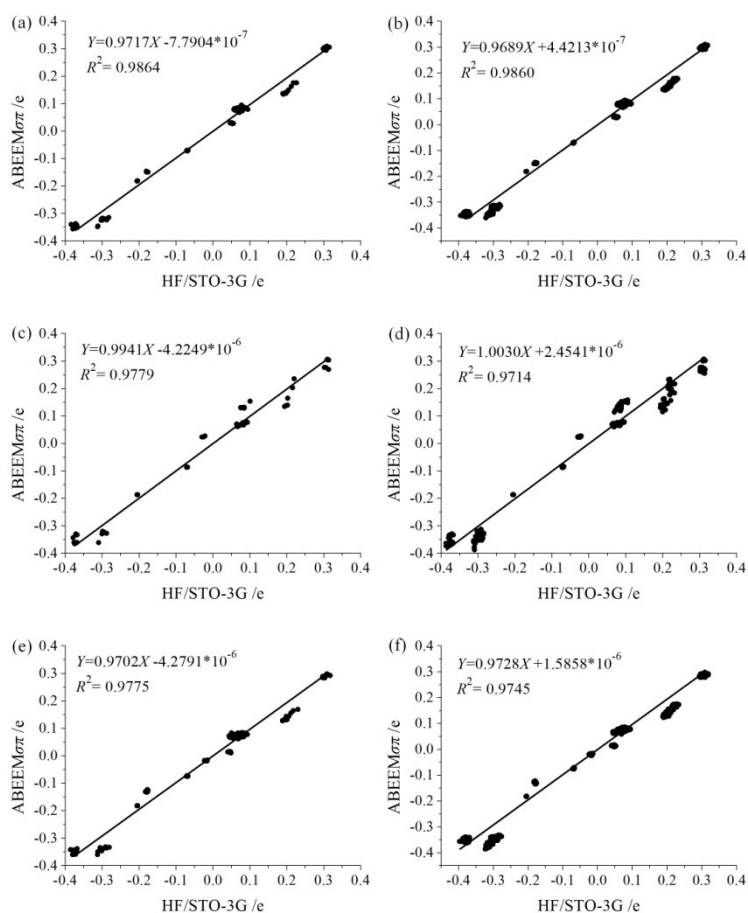

Fig. S1 A comparison of charge distributions obtained from the ABEEM method and the *ab initio* HF/STO-3G method. (a) Ala-dipeptides; (b)Ala-tripeptides; (c)Gly-dipeptides; (d) Gly-tripeptides; (e) Val-dipeptides; (f) Val-tripeptides

The partial charge of each atom in Ala, Gly, Val dipeptides and tripeptides obtained from ABEEM method is consistent with the results from HF/STO-3G based on the good transferability of parameters among different kinds peptides.

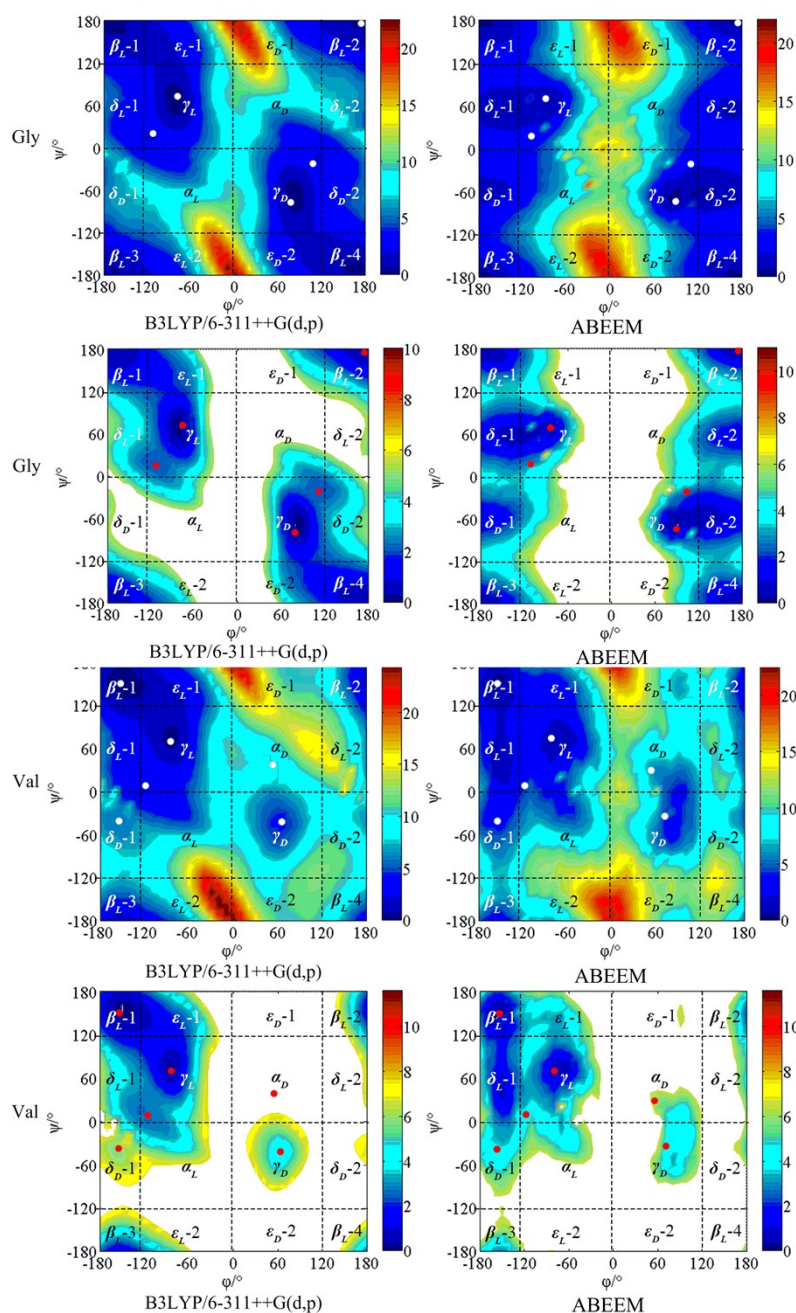

Fig. S2 Lower energy areas and stable conformations by B3LYP/6-311++G(d,p) and ABEEM polarizable force field

Figure S2 shows the lower energy area in PES of Gly and Val-dipeptide from B3LYP/6-311++G(d,p) and ABEEM polarizable force field. The distribution is similar with the favorable regions in Ramachandran map. Note that all local minima locate in the lower energy domain in the PES by ABEEM polarizable force field. The widespread area in Gly means the flexibility of its conformation, which consists well with the data from coil library.

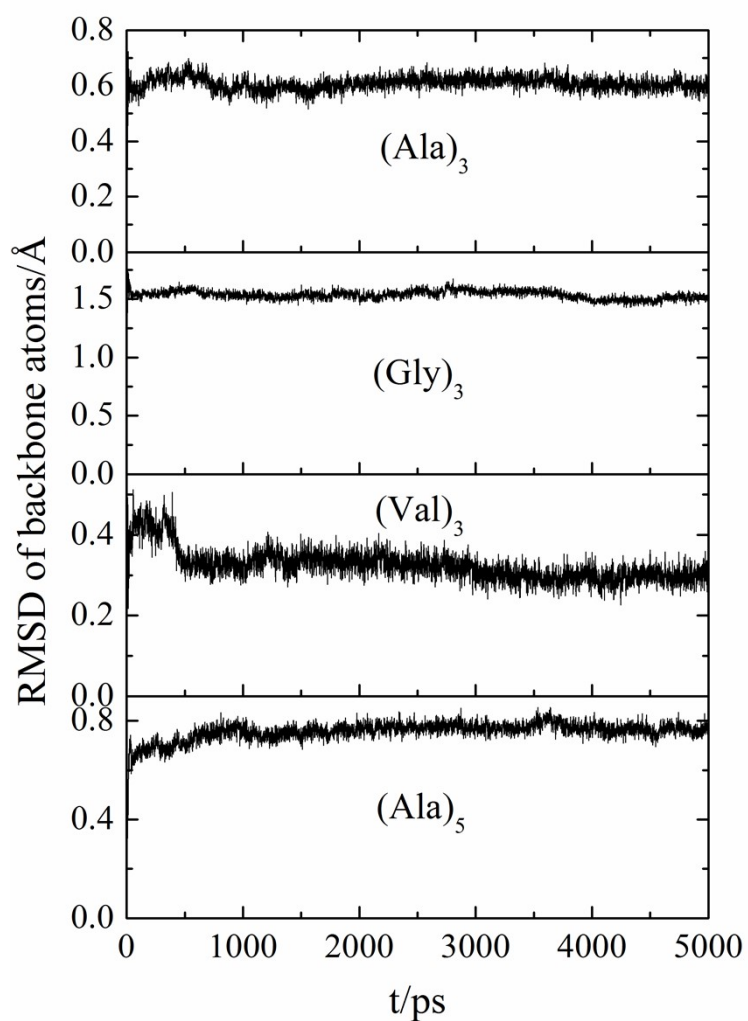

Fig. S3 RMSD of backbone atoms from dynamic simulations of (Ala)<sub>3</sub>, (Gly)<sub>3</sub>, (Val)<sub>3</sub> and (Ala)<sub>5</sub>

For each simulation, a dynamic equilibrium of 1000 ps was carried out, followed by a dynamic simulation of 4000 ps. For (Ala)<sub>3</sub>, (Val)<sub>3</sub> and (Ala)<sub>5</sub>, the system achieve dynamic equilibrium after 750ps, 500ps and 800ps, so a dynamic equilibrium of 1000 ps is enough, and the results from followed dynamic are credible.

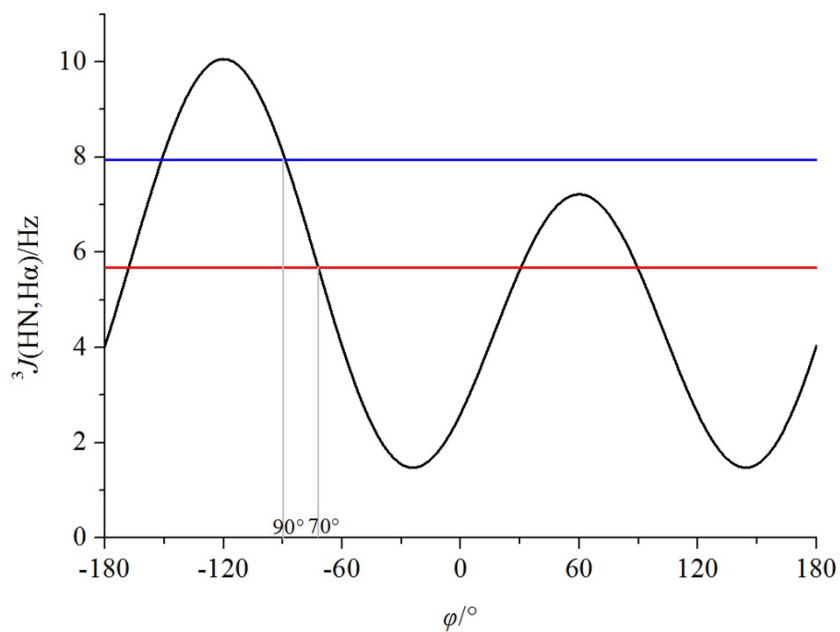

Fig. S4 Karplus curve (black line) of the measured  $J$ -coupling constant  $^3J(\text{H}_\text{N}, \text{H}_\alpha)$  for center residue of (Ala)<sub>3</sub> (red line) and (Val)<sub>3</sub> (blue line) from conformations derived from MD simulation by ABEEM polarizable force field

$^3J(\text{H}_\text{N}, \text{H}_\alpha)$  is the most sensitive value measured by  $\varphi$ .  $R2_{\text{A3}}$  and  $R2_{\text{V3}}$  differs with more than 2 Hz with only  $20^\circ$  difference of  $\varphi$ .
